# Supplementary material for: Comparative Mitogenomic Analyses of Darkling Beetles (Coleoptera: Tenebrionidae) Provide Evolutionary Insights into tRNA-like Sequences
Source: MDPI journal article supplement (doi:10.3390/genes14091738), 2023-08-30

A

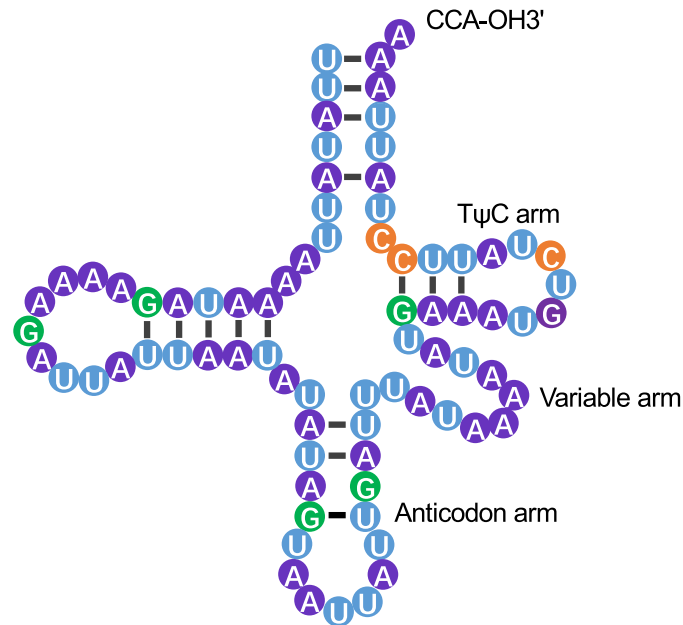

**trnN-like**  
*Myladina unguiculina*  
**72.30%**

B

|                                              | 1     | 2     | 3     | 4     | 5     | 6     | 7     | 8     | 9     | 10    | 11    | 12    | 13    | 14 |
|----------------------------------------------|-------|-------|-------|-------|-------|-------|-------|-------|-------|-------|-------|-------|-------|----|
| 1 <i>Gonocephalum</i> sp <i>trnN</i>         |       |       |       |       |       |       |       |       |       |       |       |       |       |    |
| 2 <i>Opatrum sabulosum trnN</i>              | 0.133 |       |       |       |       |       |       |       |       |       |       |       |       |    |
| 3 <i>Melanesthes exilidentata trnN</i>       | 0.067 | 0.067 |       |       |       |       |       |       |       |       |       |       |       |    |
| 4 <i>Myladina unguiculina trnN</i>           | 0.133 | 0.067 | 0.133 |       |       |       |       |       |       |       |       |       |       |    |
| 5 <i>Tenebrio molitor trnN</i>               | 0.067 | 0.200 | 0.133 | 0.200 |       |       |       |       |       |       |       |       |       |    |
| 6 <i>Tenebrio obscurus trnN</i>              | 0.133 | 0.133 | 0.133 | 0.067 | 0.200 |       |       |       |       |       |       |       |       |    |
| 7 <i>Blaps rhynchoptera trnN</i>             | 0.067 | 0.067 | 0.000 | 0.133 | 0.133 | 0.133 |       |       |       |       |       |       |       |    |
| 8 <i>Tribolium audax trnN</i>                | 0.133 | 0.200 | 0.133 | 0.133 | 0.200 | 0.133 | 0.133 |       |       |       |       |       |       |    |
| 9 <i>Tribolium castaneum trnN</i>            | 0.133 | 0.067 | 0.133 | 0.000 | 0.200 | 0.067 | 0.133 | 0.133 |       |       |       |       |       |    |
| 10 <i>Tribolium confusum trnN</i>            | 0.133 | 0.067 | 0.133 | 0.000 | 0.200 | 0.067 | 0.133 | 0.133 | 0.000 |       |       |       |       |    |
| 11 <i>Myladina unguiculina trnN-like</i>     | 0.786 | 0.714 | 0.714 | 0.786 | 0.786 | 0.786 | 0.714 | 0.786 | 0.786 | 0.786 |       |       |       |    |
| 12 <i>Melanesthes exilidentata trnN-like</i> | 0.786 | 0.714 | 0.714 | 0.786 | 0.786 | 0.786 | 0.714 | 0.786 | 0.786 | 0.786 | 0.071 |       |       |    |
| 13 <i>Gonocephalum</i> sp <i>trnN-like</i>   | 0.733 | 0.733 | 0.733 | 0.667 | 0.733 | 0.667 | 0.733 | 0.667 | 0.667 | 0.667 | 0.857 | 0.857 |       |    |
| 14 <i>Opatrum sabulosum trnN-like</i>        | 0.867 | 0.800 | 0.867 | 0.800 | 0.933 | 0.867 | 0.867 | 0.867 | 0.800 | 0.800 | 0.786 | 0.714 | 0.867 |    |

C

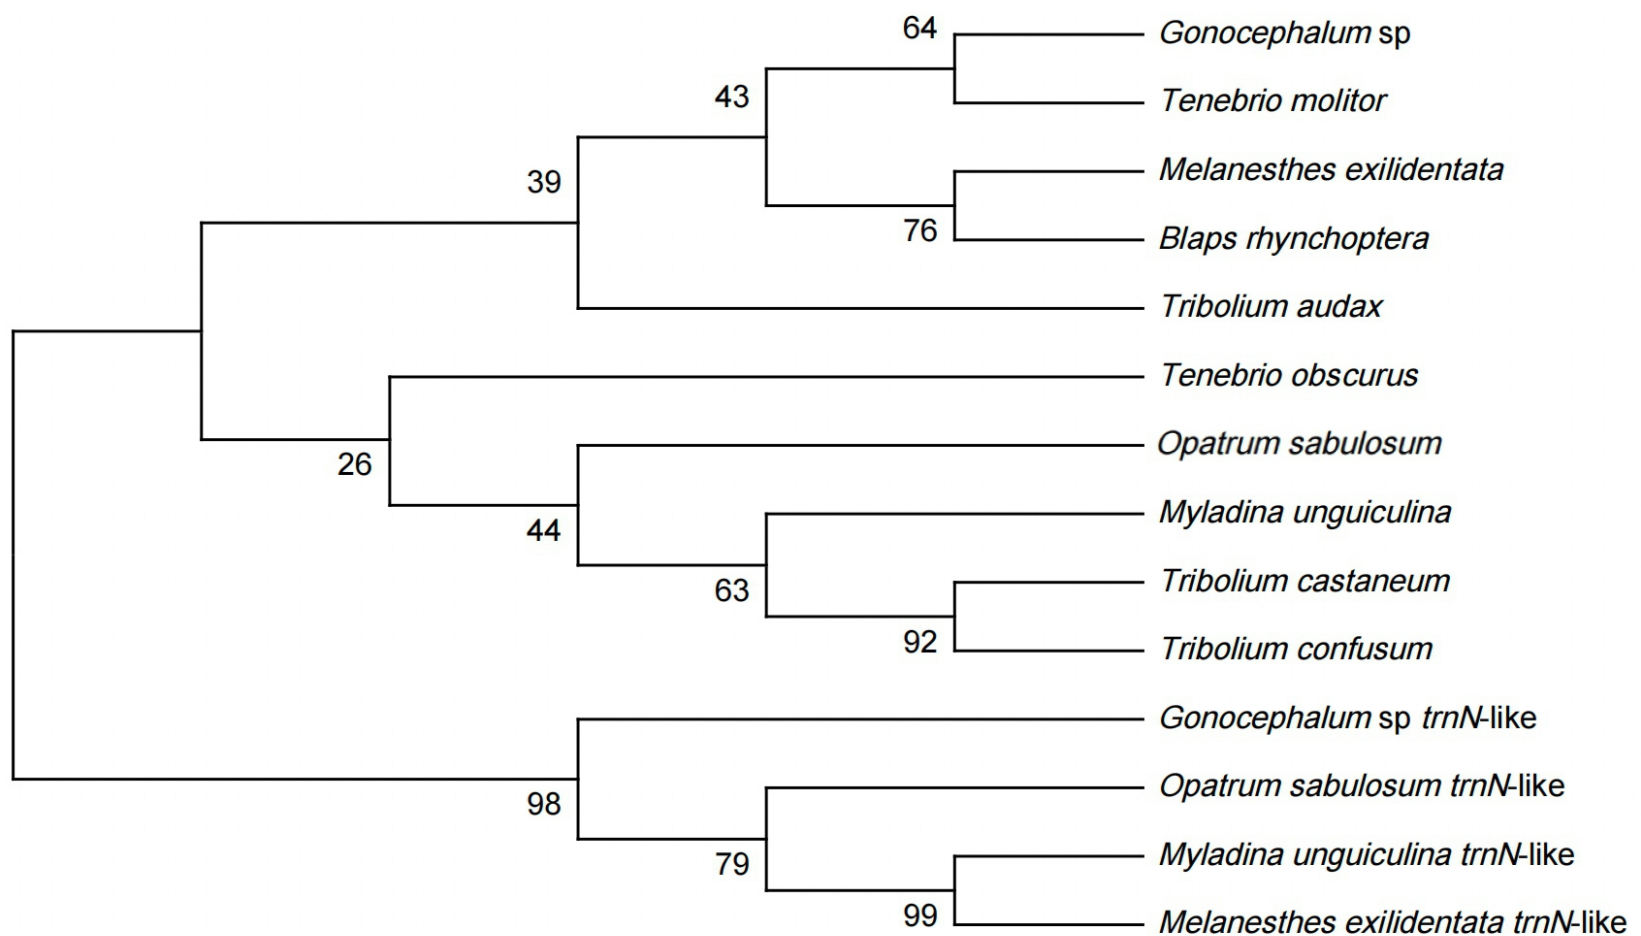

Supplement: s1 [file s1]
