# Supplementary material for: Comparative Mitogenomic Analyses of Darkling Beetles (Coleoptera: Tenebrionidae) Provide Evolutionary Insights into tRNA-like Sequences
Source: MDPI journal article supplement (doi:10.3390/genes14091738), 2023-08-30
Supplement: s1 [file s1]

**Table S4** Annotation and organization of three mitochondrial genomes newly sequenced in this study.

| Annotation and organization of the complete mitochondrial genome of <i>Melanesthes exilidentata</i> |        |       |       |             |                        |             |            |           |
|-----------------------------------------------------------------------------------------------------|--------|-------|-------|-------------|------------------------|-------------|------------|-----------|
| Gene                                                                                                | Strand | Start | End   | Length (bp) | Intergenic nucleotides | Start codon | Stop codon | Anticodon |
| <i>cox1</i>                                                                                         | J      | 1     | 1542  | 1542        | 0                      | TTA         | TAA        |           |
| <i>trnL2</i>                                                                                        | J      | 1537  | 1603  | 67          | -6                     |             |            | TAA       |
| <i>cox2</i>                                                                                         | J      | 1604  | 2291  | 688         | 0                      | ATA         | T          |           |
| <i>trnK</i>                                                                                         | J      | 2292  | 2362  | 71          | 0                      |             |            | CTT       |
| <i>trnD</i>                                                                                         | J      | 2362  | 2427  | 66          | -1                     |             |            | GTC       |
| <i>atp8</i>                                                                                         | J      | 2428  | 2586  | 159         | 0                      | ATC         | TAG        |           |
| <i>atp6</i>                                                                                         | J      | 2580  | 3251  | 672         | -7                     | ATG         | TAA        |           |
| <i>cox3</i>                                                                                         | J      | 3251  | 4035  | 785         | -1                     | ATG         | TA         |           |
| <i>trnG</i>                                                                                         | J      | 4035  | 4097  | 63          | -1                     |             |            | TCC       |
| <i>nad3</i>                                                                                         | J      | 4098  | 4451  | 354         | 0                      | ATT         | TAG        |           |
| <i>trnA</i>                                                                                         | J      | 4451  | 4515  | 65          | -1                     |             |            | TGC       |
| <i>trnR</i>                                                                                         | J      | 4515  | 4579  | 65          | -1                     |             |            | TCG       |
| <i>trnN</i>                                                                                         | J      | 4579  | 4645  | 67          | -1                     |             |            | GTT       |
| <i>trnS1</i>                                                                                        | J      | 4646  | 4706  | 61          | 0                      |             |            | TCT       |
| <i>trnE</i>                                                                                         | J      | 4707  | 4768  | 62          | 0                      |             |            | TTC       |
| <i>trnF</i>                                                                                         | N      | 4767  | 4831  | 65          | -2                     |             |            | GAA       |
| <i>nad5</i>                                                                                         | N      | 4835  | 6545  | 1711        | 3                      | ATT         | T          |           |
| <i>trnH</i>                                                                                         | N      | 6546  | 6609  | 64          | 0                      |             |            | GTG       |
| <i>nad4</i>                                                                                         | N      | 6610  | 7942  | 1333        | 0                      | ATG         | T          |           |
| <i>nad4L</i>                                                                                        | N      | 7936  | 8217  | 282         | -7                     | ATA         | TAA        |           |
| <i>trnT</i>                                                                                         | J      | 8225  | 8289  | 65          | 7                      |             |            | TGT       |
| <i>trnP</i>                                                                                         | N      | 8290  | 8355  | 66          | 0                      |             |            | TGG       |
| <i>nad6</i>                                                                                         | J      | 8358  | 8852  | 495         | 2                      | ATT         | TAA        |           |
| <i>cob</i>                                                                                          | J      | 8852  | 9988  | 1137        | -1                     | ATG         | TAA        |           |
| <i>trnS2</i>                                                                                        | J      | 9987  | 10054 | 68          | -2                     |             |            | TGA       |
| <i>nad1</i>                                                                                         | N      | 10071 | 11021 | 951         | 16                     | TTG         | TAG        |           |
| <i>trnL1</i>                                                                                        | N      | 11022 | 11087 | 66          | 0                      |             |            | TAG       |
| <i>rrnL</i>                                                                                         | N      | 11091 | 12367 | 1277        | 3                      |             |            |           |
| <i>trnV</i>                                                                                         | N      | 12368 | 12436 | 69          | 0                      |             |            | TAC       |
| <i>rrnS</i>                                                                                         | N      | 12437 | 13204 | 768         | 0                      |             |            |           |
| CR                                                                                                  | J      | 13205 | 14358 | 1154        | 0                      |             |            |           |
| <i>trnI</i>                                                                                         | J      | 14359 | 14422 | 64          | -3                     |             |            | GAT       |
| <i>trnQ</i>                                                                                         | N      | 14420 | 14488 | 69          | -2                     |             |            | TTG       |
| <i>trnM</i>                                                                                         | J      | 14487 | 14556 | 70          | 0                      |             |            | CAT       |
| <i>nad2</i>                                                                                         | J      | 14557 | 15567 | 1011        | 0                      | ATT         | TAG        |           |
| <i>trnW</i>                                                                                         | J      | 15571 | 15636 | 66          | 3                      |             |            | TCA       |
| <i>trnC</i>                                                                                         | N      | 15684 | 15744 | 61          | 47                     |             |            | GCA       |
| <i>trnY</i>                                                                                         | N      | 15745 | 5     | 65          | 0                      |             |            | GTA       |

| Annotation and organization of the complete mitochondrial genome of <i>Anatolica potanini</i> |        |       |       |             |                        |             |            |           |
|-----------------------------------------------------------------------------------------------|--------|-------|-------|-------------|------------------------|-------------|------------|-----------|
| Gene                                                                                          | Strand | Start | End   | Length (bp) | Intergenic nucleotides | Start codon | Stop codon | Anticodon |
| <i>cox1</i>                                                                                   | J      | 1     | 1537  | 1540        | 0                      | ACG         | T          |           |
| <i>trnL2</i>                                                                                  | J      | 1538  | 1603  | 65          | 0                      |             |            | TAA       |
| <i>cox2</i>                                                                                   | J      | 1612  | 2284  | 688         | 0                      | ATG         | T          |           |
| <i>trnK</i>                                                                                   | J      | 2292  | 2362  | 71          | 0                      |             |            | CTT       |
| <i>trnD</i>                                                                                   | J      | 2362  | 2427  | 66          | -1                     |             |            | GTC       |
| <i>atp8</i>                                                                                   | J      | 2428  | 2586  | 159         | 0                      | ATT         | TAG        |           |
| <i>atp6</i>                                                                                   | J      | 2580  | 3251  | 672         | -7                     | ATG         | TAA        |           |
| <i>cox3</i>                                                                                   | J      | 3251  | 4034  | 785         | -1                     | ATG         | T          |           |
| <i>trnG</i>                                                                                   | J      | 4035  | 4097  | 63          | -1                     |             |            | TCC       |
| <i>nad3</i>                                                                                   | J      | 4098  | 4451  | 354         | -2                     | ATT         | TAG        |           |
| <i>trnA</i>                                                                                   | J      | 4449  | 4515  | 67          | -3                     |             |            | TGC       |
| <i>trnR</i>                                                                                   | J      | 4515  | 4580  | 66          | -1                     |             |            | TCG       |
| <i>trnN</i>                                                                                   | J      | 4580  | 4646  | 67          | -1                     |             |            | GTT       |
| <i>trnS1</i>                                                                                  | J      | 4647  | 4707  | 61          | 0                      |             |            | TCT       |
| <i>trnE</i>                                                                                   | J      | 4708  | 4770  | 63          | 0                      |             |            | TTC       |
| <i>trnF</i>                                                                                   | N      | 4769  | 4833  | 65          | -2                     |             |            | GAA       |
| <i>nad5</i>                                                                                   | N      | 4837  | 6544  | 1708        | 3                      | ATT         | T          |           |
| <i>trnH</i>                                                                                   | N      | 6545  | 6611  | 67          | 0                      |             |            | GTG       |
| <i>nad4</i>                                                                                   | N      | 6612  | 7944  | 1333        | 0                      | ATG         | T          |           |
| <i>nad4L</i>                                                                                  | N      | 7938  | 8219  | 282         | -7                     | ATA         | TAA        |           |
| <i>trnT</i>                                                                                   | J      | 8228  | 8291  | 64          | 8                      |             |            | TGT       |
| <i>trnP</i>                                                                                   | N      | 8292  | 8357  | 66          | 0                      |             |            | TGG       |
| <i>nad6</i>                                                                                   | J      | 8360  | 8854  | 495         | 2                      | ATT         | TAA        |           |
| <i>cob</i>                                                                                    | J      | 8854  | 9990  | 1137        | -1                     | ATG         | TAA        |           |
| <i>trnS2</i>                                                                                  | J      | 9989  | 10056 | 68          | -2                     |             |            | TGA       |
| <i>nad1</i>                                                                                   | N      | 10073 | 11023 | 951         | 16                     | TTG         | TAG        |           |
| <i>trnL1</i>                                                                                  | N      | 11024 | 11088 | 65          | 0                      |             |            | TAG       |
| <i>rrnL</i>                                                                                   | N      | 11092 | 12369 | 1278        | 3                      |             |            |           |
| <i>trnV</i>                                                                                   | N      | 12370 | 12438 | 69          | 0                      |             |            | TAC       |
| <i>rrnS</i>                                                                                   | N      | 12439 | 13204 | 766         | 0                      |             |            |           |
| CR                                                                                            | J      | 13205 | 14358 | 1154        | 0                      |             |            |           |
| <i>trnI</i>                                                                                   | J      | 14359 | 14422 | 64          | 0                      |             |            | GAT       |
| <i>trnQ</i>                                                                                   | N      | 14420 | 14488 | 69          | -3                     |             |            | TTG       |
| <i>trnM</i>                                                                                   | J      | 14488 | 14556 | 69          | -1                     |             |            | CAT       |
| <i>nad2</i>                                                                                   | J      | 14557 | 15567 | 1011        | 0                      | ATT         | TAG        |           |
| <i>trnW</i>                                                                                   | J      | 15571 | 15636 | 66          | 3                      |             |            | TCA       |
| <i>trnC</i>                                                                                   | N      | 15684 | 15744 | 61          | 47                     |             |            | GCA       |
| <i>trnY</i>                                                                                   | N      | 15745 | 15809 | 65          | 0                      |             |            | GTA       |

| Annotation and organization of the complete mitochondrial genome of <i>Myladina unguiculina</i> |        |       |       |             |                        |             |            |           |
|-------------------------------------------------------------------------------------------------|--------|-------|-------|-------------|------------------------|-------------|------------|-----------|
| Gene                                                                                            | Strand | Start | End   | Length (bp) | Intergenic nucleotides | Start codon | Stop codon | Anticodon |
| <i>cox1</i>                                                                                     | J      | 1     | 1540  | 1540        | 0                      | ATT         | TAA        | TAA       |
| <i>trnL2</i>                                                                                    | J      | 1541  | 1605  | 65          | 0                      |             |            |           |
| <i>cox2</i>                                                                                     | J      | 1606  | 2293  | 688         | 0                      | ATC         | T          |           |
| <i>trnK</i>                                                                                     | J      | 2294  | 2364  | 71          | 0                      |             |            | CTT       |
| <i>trnD</i>                                                                                     | J      | 2365  | 2429  | 65          | 0                      |             |            | GTC       |
| <i>atp8</i>                                                                                     | J      | 2430  | 2588  | 159         | 0                      | ATA         | TAG        |           |
| <i>atp6</i>                                                                                     | J      | 2582  | 3253  | 672         | -7                     | ATG         | TAA        |           |
| <i>cox3</i>                                                                                     | J      | 3253  | 4037  | 785         | -1                     | ATG         | TA         |           |
| <i>trnG</i>                                                                                     | J      | 4037  | 4099  | 63          | -1                     |             |            | TCC       |
| <i>nad3</i>                                                                                     | J      | 4100  | 4453  | 354         | 0                      | ATA         | TAG        |           |
| <i>trnA</i>                                                                                     | J      | 4451  | 4518  | 68          | -3                     |             |            | TGC       |
| <i>trnR</i>                                                                                     | J      | 4516  | 4579  | 64          | -3                     |             |            | TCG       |
| <i>trnN</i>                                                                                     | J      | 4580  | 4644  | 65          | 0                      |             |            | GTT       |
| <i>trnS1</i>                                                                                    | J      | 4645  | 4705  | 61          | 0                      |             |            | TCT       |
| <i>trnE</i>                                                                                     | J      | 4706  | 4767  | 62          | 0                      |             |            | TTC       |
| <i>trnF</i>                                                                                     | N      | 4766  | 4830  | 65          | -2                     |             |            | GAA       |
| <i>nad5</i>                                                                                     | N      | 4831  | 6522  | 1692        | 0                      | ATT         | TAG        |           |
| <i>trnH</i>                                                                                     | N      | 6542  | 6605  | 64          | 19                     |             |            | GTG       |
| <i>nad4</i>                                                                                     | N      | 6612  | 7938  | 1327        | 6                      | ATG         | T          |           |
| <i>nad4L</i>                                                                                    | N      | 7931  | 8219  | 289         | -8                     | ATG         | TAA        |           |
| <i>trnT</i>                                                                                     | J      | 8222  | 8286  | 65          | 2                      |             |            | TGT       |
| <i>trnP</i>                                                                                     | N      | 8287  | 8352  | 66          | 0                      |             |            | TGG       |
| <i>nad6</i>                                                                                     | J      | 8355  | 8849  | 495         | 2                      | ATA         | TAA        |           |
| <i>cob</i>                                                                                      | J      | 8849  | 9988  | 1140        | -1                     | ATG         | TAA        |           |
| <i>trnS2</i>                                                                                    | J      | 9987  | 10053 | 67          | -2                     |             |            | TGA       |
| <i>nad1</i>                                                                                     | N      | 10074 | 11024 | 951         | 20                     | CTG         | TAG        |           |
| <i>trnL1</i>                                                                                    | N      | 11025 | 11087 | 63          | 0                      |             |            | TAG       |
| <i>rrnL</i>                                                                                     | N      | 11088 | 12368 | 1281        | 0                      |             |            |           |
| <i>trnV</i>                                                                                     | N      | 12369 | 12438 | 70          | 0                      |             |            | TAC       |
| <i>rrnS</i>                                                                                     | N      | 12439 | 13203 | 765         | 0                      |             |            |           |
| CR                                                                                              | J      | 13204 | 14133 | 930         | 0                      |             |            |           |
| <i>trnI</i>                                                                                     | J      | 14134 | 14197 | 64          | 0                      |             |            | GAT       |
| <i>trnQ</i>                                                                                     | N      | 14195 | 14263 | 69          | -3                     |             |            | TTG       |
| <i>trnM</i>                                                                                     | J      | 14263 | 14332 | 70          | -1                     |             |            | CAT       |
| <i>nad2</i>                                                                                     | J      | 14332 | 15342 | 1011        | -1                     | ATT         | TAA        |           |
| <i>trnW</i>                                                                                     | J      | 15341 | 15408 | 68          | -2                     |             |            | TCA       |
| <i>trnC</i>                                                                                     | N      | 15418 | 15478 | 61          | 9                      |             |            | GCA       |
| <i>trnY</i>                                                                                     | N      | 15479 | 8     | 64          | 0                      |             |            | GTA       |
