# Supplementary material for: Comparative Mitogenomic Analyses of Darkling Beetles (Coleoptera: Tenebrionidae) Provide Evolutionary Insights into tRNA-like Sequences
Source: MDPI journal article supplement (doi:10.3390/genes14091738), 2023-08-30
Supplement: s1 [file s1]

**Table S3** The best partitioning schemes and substitution models selected by IQ-TREE for the three datasets.

| Dataset | Subset | Best-fit scheme                                                                                                                | Model        |
|---------|--------|--------------------------------------------------------------------------------------------------------------------------------|--------------|
| P123    | P1     | <i>atp6_pos1+cob_pos1+cox1_pos1+cox2_pos1+cox3_pos1</i>                                                                        | GTR+F+I+G4   |
|         | P2     | <i>atp6_pos2+cob_pos2+cox1_pos2+cox2_pos2+cox3_pos2+nad1_pos2+nad2_pos2+nad3_pos2+nad4_pos2+nad4L_pos2+nad5_pos2+nad6_pos2</i> | TVM+F+I+G4   |
|         | P3     | <i>atp6_pos3+atp8_pos3+cob_pos3+cox1_pos3+cox2_pos3+cox3_pos3+nad2_pos3+nad3_pos3+nad6_pos3</i>                                | TPM3+F+I+G4  |
|         | P4     | <i>atp8_pos1+atp8_pos2+nad2_pos1+nad3_pos1+nad6_pos1</i>                                                                       | GTR+F+I+G4   |
|         | P5     | <i>nad1_pos1+nad4_pos1+nad4L_pos1+nad5_pos1</i>                                                                                | GTR+F+I+G4   |
|         | P6     | <i>nad1_pos3+nad4_pos3+nad4L_pos3+nad5_pos3</i>                                                                                | K3Pu+F+I+G4  |
| P123RNA | P1     | <i>atp6_pos1+cob_pos1+cox1_pos1+cox2_pos1+cox3_pos1</i>                                                                        | GTR+F+I+G4   |
|         | P2     | <i>atp6_pos2+cob_pos2+cox1_pos2+cox2_pos2+cox3_pos2+nad1_pos2+nad2_pos2+nad3_pos2+nad4_pos2+nad4L_pos2+nad5_pos2+nad6_pos2</i> | TVM+F+I+G4   |
|         | P3     | <i>atp6_pos3+atp8_pos3+cob_pos3+cox1_pos3+cox2_pos3+cox3_pos3+nad2_pos3+nad3_pos3+nad6_pos3</i>                                | TPM3+F+I+G4  |
|         | P4     | <i>atp8_pos1+atp8_pos2+nad2_pos1+nad3_pos1+nad6_pos1</i>                                                                       | GTR+F+I+G4   |
|         | P5     | <i>nad1_pos1+nad4_pos1+nad4L_pos1+nad5_pos1+rrnL+rrnS</i>                                                                      | TVM+F+I+G4   |
|         | P6     | <i>nad1_pos3+nad4_pos3+nad4L_pos3+nad5_pos3</i>                                                                                | K3Pu+F+I+G4  |
| P123AA  | P1     | <i>atp6+atp8+nad2+nad3+nad6</i>                                                                                                | mtMet+F+I+G4 |
|         | P2     | <i>cob+cox1+cox2+cox3</i>                                                                                                      | mtART+I+G4   |
|         | P3     | <i>nad1+nad4+nad4L+nad5</i>                                                                                                    | mtZOA+F+I+G4 |
