# Supplementary material for: Comparative Mitogenomic Analyses of Darkling Beetles (Coleoptera: Tenebrionidae) Provide Evolutionary Insights into tRNA-like Sequences
Source: MDPI journal article supplement (doi:10.3390/genes14091738), 2023-08-30
Supplement: s1 [file s1]

**Table S7** Number of occurrences and matching of tRNA-like structures in Tenebrionidae mitochondrial genomes.

| tRNA-like          | Times | Matching Range (%) | Presence In Species                                                                                                                                                                                                                                                            |
|--------------------|-------|--------------------|--------------------------------------------------------------------------------------------------------------------------------------------------------------------------------------------------------------------------------------------------------------------------------|
| <i>trnC</i> -like  | 1     | 58.06              | <i>Tribolium audax</i>                                                                                                                                                                                                                                                         |
| <i>trnD</i> -like  | 1     | 65.63              | <i>Adelium</i> sp                                                                                                                                                                                                                                                              |
| <i>trnE</i> -like  | 4     | 61.90~69.12        | <i>Amarygmini</i> sp, <i>Blaps rhynchoptera</i> , <i>Myladina unguiculina</i> , <i>Tribolium audax</i>                                                                                                                                                                         |
| <i>trnF</i> -like  | 1     | 62.12              | <i>Alphitobius diaperinus</i>                                                                                                                                                                                                                                                  |
| <i>trnI</i> -like  | 2     | 57.81              | <i>Melanesthes exilidentata</i> , <i>Philolithus aegrotus</i>                                                                                                                                                                                                                  |
| <i>trnK</i> -like  | 2     | 50.70~64.79        | <i>Anatolica potanini</i> , <i>Machla setosa</i>                                                                                                                                                                                                                               |
| <i>trnL1</i> -like | 1     | 55.88              | <i>Tribolium confusum</i>                                                                                                                                                                                                                                                      |
| <i>trnL2</i> -like | 9     | 49.25~57.58        | <i>Anatolica potanini</i> , <i>Alphitobius diaperinus</i> , <i>Amarygmini</i> sp,<br><i>Morphostenophanes sinicus</i> , <i>Pelecyphorus foveolatus</i> , <i>Pelecyphorus contortus</i><br><i>Promethis valgipes</i> , <i>Tenebrio obscurus</i> , <i>Ulomoides dermestoides</i> |
| <i>trnM</i> -like  | 1     | 47.14              | <i>Promethis valgipes</i>                                                                                                                                                                                                                                                      |
| <i>trnN</i> -like  | 2     | 53.85~59.10        | <i>Adelium</i> sp, <i>Stenomorpha obovata</i>                                                                                                                                                                                                                                  |
| <i>trnP</i> -like  | 1     | 60.61              | <i>Alphitobius diaperinus</i>                                                                                                                                                                                                                                                  |
| <i>trnR</i> -like  | 2     | 56.10~60.61        | <i>Pelecyphorus contortus</i> , <i>Stenomorpha obovata</i>                                                                                                                                                                                                                     |
| <i>trnS1</i> -like | 2     | 65.00~68.33        | <i>Tribolium castaneum</i> , <i>Ulomoides dermestoides</i>                                                                                                                                                                                                                     |
| <i>trnS2</i> -like | 2     | 58.82~67.75        | <i>Machla setosa</i> , <i>Nalassus laevioctriatus</i>                                                                                                                                                                                                                          |
| <i>trnT</i> -like  | 1     | 63.08              | <i>Tribolium confusum</i>                                                                                                                                                                                                                                                      |
| <i>trnV</i> -like  | 5     | 55.71~62.86        | <i>Gonocephalum</i> sp, <i>Machla setosa</i> , <i>Myladina unguiculina</i> , <i>Stenomorpha consobrina</i> , <i>Tenebrio obscurus</i>                                                                                                                                          |
| <i>trnW</i> -like  | 7     | 54.55~59.10        | <i>Anatolica potanini</i> , <i>Gonocephalum</i> sp, <i>Nalassus laevioctriatus</i> , <i>Pelecyphorus contortus</i> ,<br><i>Pelecyphorus foveolatus</i> , <i>Stenomorpha obovate</i> , <i>Tribolium confusum</i> , <i>Uloma</i> sp                                              |
| <i>trnY</i> -like  | 1     | 54.69              | <i>Ulomoides dermestoides</i>                                                                                                                                                                                                                                                  |
