# Supplementary material for: Comparative Mitogenomic Analyses of Darkling Beetles (Coleoptera: Tenebrionidae) Provide Evolutionary Insights into tRNA-like Sequences
Source: MDPI journal article supplement (doi:10.3390/genes14091738), 2023-08-30
Supplement: s1 [file s1]

**Table S2** Saturation test for the 13 protein-coding genes (PCGs, the P123 dataset), concentration of 13 PCGs and two ribosomal RNA genes (the P123RNA dataset), and each of the three positions of 13 PCGs as implemented in DAMBE.

|           | Dataset           | P123  | P123RNA | Position 1st | Position 2nd | Position 3rd |
|-----------|-------------------|-------|---------|--------------|--------------|--------------|
|           | Gene size<br>(nt) | 11171 | 13378   | 3723         | 3723         | 3723         |
| NumOTU-4  | Iss               | 0.343 | 0.366   | 0.268        | 0.135        | 0.137        |
|           | Iss.c             | 0.858 | 0.859   | 0.849        | 0.849        | 0.849        |
|           | <i>P</i>          | 0     | 0       | 0            | 0            | 0            |
| NumOTU-8  | Iss               | 0.349 | 0.367   | 0.265        | 0.139        | 0.139        |
|           | Iss.c             | 0.845 | 0.844   | 0.842        | 0.842        | 0.842        |
|           | <i>P</i>          | 0     | 0       | 0            | 0            | 0            |
| NumOTU-16 | Iss               | 0.349 | 0.383   | 0.273        | 0.145        | 0.14         |
|           | Iss.c             | 0.85  | 0.853   | 0.827        | 0.827        | 0.827        |
|           | <i>P</i>          | 0     | 0       | 0            | 0            | 0            |
| NumOTU-32 | Iss               | 0.356 | 0.395   | 0.282        | 0.149        | 0.149        |
|           | Iss.c             | 0.818 | 0.819   | 0.809        | 0.809        | 0.809        |
|           | <i>P</i>          | 0     | 0       | 0            | 0            | 0            |
| NumOTU-4  | Iss               | 0.343 | 0.366   | 0.268        | 0.135        | 0.137        |
|           | Iss.cA            | 0.846 | 0.847   | 0.837        | 0.837        | 0.837        |
|           | <i>P</i>          | 0     | 0       | 0            | 0            | 0            |
| NumOTU-8  | Iss               | 0.349 | 0.367   | 0.265        | 0.139        | 0.139        |
|           | Iss.cA            | 0.762 | 0.761   | 0.758        | 0.758        | 0.758        |
|           | <i>P</i>          | 0     | 0       | 0            | 0            | 0            |
| NumOTU-16 | Iss               | 0.349 | 0.383   | 0.273        | 0.145        | 0.14         |
|           | Iss.cA            | 0.676 | 0.675   | 0.668        | 0.668        | 0.668        |
|           | <i>P</i>          | 0     | 0       | 0            | 0            | 0            |
| NumOTU-32 | Iss               | 0.356 | 0.395   | 0.282        | 0.149        | 0.149        |
|           | Iss.cA            | 0.572 | 0.573   | 0.809        | 0.554        | 0.554        |
|           | <i>P</i>          | 0     | 0       | 0            | 0            | 0            |
