# Supplementary material for: Comparative Mitogenomic Analyses of Darkling Beetles (Coleoptera: Tenebrionidae) Provide Evolutionary Insights into tRNA-like Sequences
Source: MDPI journal article supplement (doi:10.3390/genes14091738), 2023-08-30
Supplement: s1 [file s1]

**Table S6** Distribution of tRNA-like sequences in all Tenebrionidae species in this study.

| Species                          | tRNA-like          | Matching (%) | tRNA-like          | Matching (%) | tRNA-like         | Matching (%) |
|----------------------------------|--------------------|--------------|--------------------|--------------|-------------------|--------------|
| <i>Adelium</i> sp                | <i>trnD</i> -like  | 65.63        | <i>trnN</i> -like  | 59.10        |                   |              |
| <i>Alphitobius diaperinus</i>    | <i>trnF</i> -like  | 62.12        | <i>trnL2</i> -like | 52.94        | <i>trnP</i> -like | 60.61        |
| <i>Amarygmini</i> sp             | <i>trnE</i> -like  | 61.90        | <i>trnL2</i> -like | 52.94        |                   |              |
| <i>Blaps rhynchoptera</i>        | <i>trnE</i> -like  | 69.12        | <i>trnT</i> -like  | 63.08        |                   |              |
| <i>Gonocephalum</i> sp           | <i>trnV</i> -like  | 58.57        | <i>trnW</i> -like  | 58.21        |                   |              |
| <i>Machla setosa</i>             | <i>trnK</i> -like  | 64.79        | <i>trnS2</i> -like | 58.82        | <i>trnV</i> -like | 59.10        |
| <i>Morphostenophanes sinicus</i> | <i>trnL2</i> -like | 55.22        |                    |              |                   |              |
| <i>Nalassus laevioctriatus</i>   | <i>trnS2</i> -like | 67.75        | <i>trnW</i> -like  | 60.30        |                   |              |
| <i>Pelecyphorus contortus</i>    | <i>trnL2</i> -like | 53.85        | <i>trnR</i> -like  | 56.10        | <i>trnW</i> -like | 56.10        |
| <i>Pelecyphorus foveolatus</i>   | <i>trnL2</i> -like | 57.58        | <i>trnW</i> -like  | 54.55        |                   |              |
| <i>Philolithus aegrotus</i>      | <i>trnI</i> -like  | 57.81        |                    |              |                   |              |
| <i>Promethis valgipes</i>        | <i>trnL2</i> -like | 53.03        | <i>trnM</i> -like  | 47.14        |                   |              |
| <i>Stenomorpha consobrina</i>    | <i>trnV</i> -like  | 62.86        |                    |              |                   |              |
| <i>Stenomorpha obovata</i>       | <i>trnW</i> -like  | 54.55        | <i>trnN</i> -like  | 53.85        | <i>trnR</i> -like | 60.61        |
| <i>Tenebrio obscurus</i>         | <i>trnL2</i> -like | 49.25        | <i>trnV</i> -like  | 55.71        |                   |              |
| <i>Tribolium audax</i>           | <i>trnC</i> -like  | 58.06        | <i>trnE</i> -like  | 66.15        |                   |              |
| <i>Tribolium castaneum</i>       | <i>trnS1</i> -like | 65.00        |                    |              |                   |              |
| <i>Tribolium confusum</i>        | <i>trnL1</i> -like | 55.88        | <i>trnT</i> -like  | 57.81        | <i>trnW</i> -like | 58.46        |
| <i>Uloma</i> sp                  | <i>trnW</i> -like  | 56.72        |                    |              |                   |              |
| <i>Ulomoides_dermestoides</i>    | <i>trnL2</i> -like | 52.31        | <i>trnS1</i> -like | 68.33        | <i>trnY</i> -like | 54.69        |
| <i>Melanesthes exilidentata</i>  | <i>trnI</i> -like  | 57.81        |                    |              |                   |              |
| <i>Anatolica potanini</i>        | <i>trnL2</i> -like | 54.55        | <i>trnK</i> -like  | 50.70        | <i>trnW</i> -like | 59.10        |
| <i>Myladina unguiculina</i>      | <i>trnE</i> -like  | 66.13        | <i>trnV</i> -like  | 58.57        |                   |              |
