# Supplementary material for: Comparative Mitogenomic Analyses of Darkling Beetles (Coleoptera: Tenebrionidae) Provide Evolutionary Insights into tRNA-like Sequences
Source: MDPI journal article supplement (doi:10.3390/genes14091738), 2023-08-30
Supplement: s1 [file s1]

|                                   | <i>trnS2</i> |   |   |   |   |   |   |   |          |   |   |   | <i>nad1</i> |   |           |   |   |   |   |   |   |   |   |   |   |   |   |   |   |   |   |   |   |   |   |   |   |   |   |   |
|-----------------------------------|--------------|---|---|---|---|---|---|---|----------|---|---|---|-------------|---|-----------|---|---|---|---|---|---|---|---|---|---|---|---|---|---|---|---|---|---|---|---|---|---|---|---|---|
|                                   | motif I      |   |   |   |   |   |   |   | motif II |   |   |   |             |   | motif III |   |   |   |   |   |   |   |   |   |   |   |   |   |   |   |   |   |   |   |   |   |   |   |   |   |
|                                   | C            | T | A | Y | T | A | R | T | T        |   |   |   |             | T | A         | Y | Y | A |   |   |   |   | T | T | W | T | T | A | A | C | T | A |   |   |   |   |   |   |   |   |
| <i>Adelium</i> sp                 | C            | T | A | T | T | A | G | T | T        | - | - | - | T           | A | T         | A | C | T | A | A | T | T | T | T | A | T | T | A | A | C | T | A | C | A | A | T | A | A | A |   |
| <i>Alphitobius diaperinus</i>     | C            | T | A | T | T | A | G | T | T        | - | - | - | T           | G | T         | A | C | T | A | A | A | T | T | T | A | T | T | A | A | C | T | A | T | A | A | T | A | A | A |   |
| <i>Amarygmini</i> sp              | C            | T | A | T | T | A | G | T | T        | - | - | - | T           | A | T         | A | C | T | A | A | A | T | T | T | A | T | T | A | A | C | T | A | T | A | A | T | A | A | A |   |
| <i>Asbolus verrucosus</i>         | C            | T | A | T | T | A | G | T | T        | - | - | - | T           | A | T         | A | C | T | A | A | A | T | T | T | A | T | T | A | A | C | T | A | C | A | A | T | A | A | A |   |
| <i>Blaps rhynchoptera</i>         | C            | T | A | T | T | A | G | T | T        | - | - | - | -           | T | T         | G | C | T | A | A | A | T | T | T | A | T | T | A | A | C | T | A | T | A | A | A | A | A | A |   |
| <i>Cerogria popularis</i>         | C            | T | A | C | T | A | A | T | T        | - | - | - | T           | A | T         | A | C | T | A | A | A | T | T | T | T | A | T | T | A | A | C | T | A | A | A | T | T | A | A | A |
| <i>Gonocephalum</i> sp            | C            | T | A | T | T | A | G | T | T        | - | - | - | -           | T | T         | A | C | T | A | G | A | T | T | T | A | T | T | A | A | C | T | A | T | A | A | T | A | A | A |   |
| <i>Machla setosa</i>              | C            | T | A | T | T | A | G | T | T        | - | - | - | T           | A | T         | A | C | T | A | A | A | T | T | T | A | T | T | A | A | C | T | A | C | A | A | T | A | A | A |   |
| <i>Morphostenophanes sinicus</i>  | C            | T | A | T | T | A | G | T | T        | - | - | - | T           | G | T         | A | C | T | A | G | A | T | T | T | A | T | T | A | A | C | T | A | T | A | A | C | A | A | A |   |
| <i>Morphostenophanes yunnanus</i> | C            | T | A | T | T | A | G | T | T        | - | - | - | T           | G | T         | A | C | T | A | G | A | T | T | T | A | T | T | A | A | C | T | A | T | A | A | C | A | A | A |   |
| <i>Nalassus laevioctostriatus</i> | C            | T | A | T | T | A | G | T | T        | - | - | - | T           | T | T         | A | C | T | A | A | A | T | T | T | A | T | T | A | A | C | T | A | C | A | A | T | A | A | A |   |
| <i>Opatrum sabulosum</i>          | C            | T | A | T | T | A | G | T | T        | - | - | - | -           | T | T         | A | C | T | A | G | A | T | T | T | A | T | T | A | A | C | T | A | T | A | G | A | A | A | A |   |
| <i>Pelecyphorus contortus</i>     | C            | T | A | T | T | A | G | T | T        | - | - | - | T           | G | T         | A | C | T | A | A | A | T | T | T | A | T | T | A | A | C | T | A | C | A | A | T | A | A | A |   |
| <i>Pelecyphorus foveolatus</i>    | C            | T | A | T | T | A | G | T | T        | - | - | - | T           | G | T         | A | C | T | A | A | A | T | T | T | A | T | T | A | A | C | T | A | C | A | A | T | A | A | A |   |
| <i>Philolithus aegrotus</i>       | C            | T | A | T | T | A | G | T | T        | - | - | - | T           | G | T         | A | C | T | A | A | A | T | T | T | A | T | T | A | A | C | T | A | T | A | A | T | A | A | A |   |
| <i>Philolithus</i> sp1            | C            | T | A | T | T | A | G | T | T        | - | - | - | T           | G | T         | A | C | T | A | A | A | T | T | T | A | T | T | A | A | C | T | A | T | A | A | T | A | A | A |   |
| <i>Philolithus</i> sp2            | C            | T | A | T | T | A | G | T | T        | - | - | - | T           | G | T         | A | C | T | A | A | A | T | T | T | A | T | T | A | A | C | T | A | T | A | A | T | A | A | A |   |
| <i>Platydema</i> sp               | C            | T | A | T | T | A | G | T | T        | - | - | - | -           | T | T         | A | C | T | A | A | A | T | T | T | A | T | T | A | A | C | T | A | T | A | A | T | A | A | A |   |
| <i>Promethis valgipes</i>         | C            | T | A | T | T | A | G | T | T        | - | - | - | T           | A | T         | A | C | T | A | A | A | T | T | T | A | T | T | A | A | C | T | A | A | A | G | T | A | A | A |   |
| <i>Stenomorpha consobrina</i>     | C            | T | A | T | T | A | G | T | T        | - | - | - | T           | G | T         | A | C | T | A | A | A | T | T | T | A | T | T | A | A | C | T | A | T | A | A | T | A | A | A |   |
| <i>Stenomorpha obovata</i>        | C            | T | A | T | T | A | G | T | T        | - | - | - | T           | G | T         | A | C | T | A | A | A | T | T | T | A | T | T | A | A | C | T | A | C | A | A | T | A | A | A |   |
| <i>Strongylium suspicax</i>       | C            | T | A | T | T | A | G | T | T        | - | - | - | T           | A | T         | A | C | T | A | A | A | T | T | T | A | T | T | A | A | C | T | A | A | A | A | T | A | A | A |   |
| <i>Tenebrio molitor</i>           | C            | T | A | T | T | A | G | T | T        | - | - | - | T           | A | T         | A | C | T | A | A | A | T | T | T | A | T | T | A | A | C | T | A | A | A | T | T | A | A | A |   |
| <i>Tenebrio obscurus</i>          | C            | T | A | T | T | A | G | T | T        | - | - | - | T           | A | T         | A | C | T | A | A | A | T | T | T | A | T | T | A | A | C | T | A | A | A | T | T | A | A | A |   |
| <i>Tribolium audax</i>            | C            | T | A | T | T | A | G | T | T        | - | - | - | T           | T | T         | A | C | T | A | A | A | T | T | T | A | T | T | A | A | C | T | A | A | A | T | T | A | A | A |   |
| <i>Tribolium castaneum</i>        | C            | T | A | C | T | A | G | T | T        | - | - | - | T           | A | T         | A | C | T | A | A | A | T | T | T | A | T | T | A | A | C | T | A | A | A | T | T | A | A | A |   |
| <i>Tribolium confusum</i>         | C            | T | A | T | T | A | G | T | T        | - | - | - | T           | G | T         | A | C | T | A | A | A | T | T | T | A | T | T | A | A | C | T | A | A | A | T | T | A | A | A |   |
| <i>Uloma</i> sp                   | C            | T | A | T | T | A | G | T | T        | - | - | - | -           | T | T         | A | C | T | A | A | A | T | T | T | A | T | T | A | A | C | T | A | C | A | A | T | A | A | A |   |
| <i>Ulomoides dermestoides</i>     | C            | T | A | T | T | A | G | T | T        | - | - | T | A           | G | T         | A | C | T | A | A | A | A | A | T | T | T | T | T | A | A | C | T | A | T | A | A | C | A | A | A |
| <i>Zophobas atratus</i>           | C            | T | A | T | T | A | G | T | T        | - | - | - | T           | A | T         | A | C | T | A | A | A | T | T | T | T | T | T | A | A | C | T | A | C | A | A | T | A | A | A |   |
| <i>Melanesthes exilidentata</i>   | C            | T | A | T | T | A | G | T | T        | - | - | - | -           | T | T         | A | C | T | A | G | A | T | T | T | A | T | T | A | A | C | T | A | T | A | G | A | A | A | A |   |
| <i>Anatolica potanini</i>         | C            | T | A | T | T | A | G | T | T        | T | A | T | C           | A | T         | A | C | T | A | A | A | A | T | T | T | A | T | T | A | A | C | T | A | C | A | A | T | A | A | A |
| <i>Myladina unguiculina</i>       | C            | T | A | T | T | A | G | T | T        | - | - | - | -           | - | T         | A | T | C | A | G | A | T | T | T | T | A | T | T | A | A | C | T | A | T | A | G | T | A | A | A |
