# Supplementary material for: Comparative Mitogenomic Analyses of Darkling Beetles (Coleoptera: Tenebrionidae) Provide Evolutionary Insights into tRNA-like Sequences
Source: MDPI journal article supplement (doi:10.3390/genes14091738), 2023-08-30
Supplement: s1 [file s1]

**Table S1** Characteristics of mitogenomes of 33 Tenebrionidae species.

| Famliy        | Subfamliy                   | Species                           | GenBank accession number | Genome Size (bp) |
|---------------|-----------------------------|-----------------------------------|--------------------------|------------------|
| Tenebrionidae | Lagriinae                   | <i>Adelium</i> sp                 | NC_013554                | 16449            |
| Tenebrionidae | Alphitobius                 | <i>Alphitobius diaperinus</i>     | NC_049092                | 15511            |
| Tenebrionidae | unclassified Tenebrioninae. | <i>Amarygmini</i> sp              | MH789725                 | 15942            |
| Tenebrionidae | Pimeliinae                  | <i>Asbolus verrucosus</i>         | NC_027256                | 15828            |
| Tenebrionidae | Blaptinae                   | <i>Blaps rhynchoptera</i>         | NC_047449                | 16149            |
| Tenebrionidae | Lagriinae                   | <i>Cerogria popularis</i>         | NC_061196                | 16175            |
| Tenebrionidae | Blaptinae                   | <i>Gonocephalum</i> sp            | NC_053250                | 15836            |
| Tenebrionidae | Pimeliinae                  | <i>Machla setosa</i>              | MZ342779                 | 16081            |
| Tenebrionidae | Stenochiinae                | <i>Morphostenophanes sinicus</i>  | MW853764                 | 15662            |
| Tenebrionidae | Stenochiinae                | <i>Morphostenophanes yunnanus</i> | MZ298928                 | 15690            |
| Tenebrionidae | Tenebrioninae               | <i>Nalassus laevioctostriatus</i> | KT876905                 | 15529            |
| Tenebrionidae | Blaptinae                   | <i>Opatrum sabulosum</i>          | NC_057274                | 16079            |
| Tenebrionidae | Pimeliinae                  | <i>Pelecyporus contortus</i>      | MZ342780                 | 16244            |
| Tenebrionidae | Pimeliinae                  | <i>Pelecyporus foveolatus</i>     | MZ342781                 | 16218            |
| Tenebrionidae | Pimeliinae                  | <i>Philolithus aegrotus</i>       | MZ342784                 | 16268            |
| Tenebrionidae | Pimeliinae                  | <i>Philolithus</i> sp1            | MZ342776                 | 15927            |
| Tenebrionidae | Pimeliinae                  | <i>Philolithus</i> sp2            | MZ342777                 | 15926            |
| Tenebrionidae | Diaperinae                  | <i>Platydema</i> sp               | JX412842                 | 16028            |
| Tenebrionidae | Stenochiinae                | <i>Promethis valgipes</i>         | NC_054362                | 15801            |
| Tenebrionidae | Pimeliinae                  | <i>Stenomorpha consobrina</i>     | MZ342785                 | 16243            |
| Tenebrionidae | Pimeliinae                  | <i>Stenomorpha obovata</i>        | MZ342786                 | 16223            |
| Tenebrionidae | Stenochiinae                | <i>Strongylium suspicax</i>       | JX412780                 | 12561            |

|                      |                              |                                        |                  |              |
|----------------------|------------------------------|----------------------------------------|------------------|--------------|
| Tenebrionidae        | Tenebrioninae                | <i>Tenebrio molitor</i>                | NC_024633        | 15785        |
| Tenebrionidae        | Tenebrioninae                | <i>Tenebrio obscurus</i>               | NC_037196        | 15771        |
| Tenebrionidae        | Tenebrionidae incertae sedis | <i>Tribolium audax</i>                 | NC_024600        | 15925        |
| Tenebrionidae        | Tenebrionidae incertae sedis | <i>Tribolium castaneum</i>             | NC_003081        | 15881        |
| Tenebrionidae        | Tenebrionidae incertae sedis | <i>Tribolium confusum</i>              | NC_026702        | 15813        |
| Tenebrionidae        | Tenebrioninae                | <i>Uloma</i> sp                        | KT876915         | 15909        |
| Tenebrionidae        | Diaperinae                   | <i>Ulomoides dermestoides</i>          | NC_025332        | 15434        |
| Tenebrionidae        | Tenebrioninae                | <i>Zophobas atratus</i>                | NC_041101        | 15494        |
| <b>Tenebrionidae</b> | <b>Tenebrioninae</b>         | <b><i>Melanesthes exilidentata</i></b> | <b>OQ_534869</b> | <b>15804</b> |
| <b>Tenebrionidae</b> | <b>Pimeliinae</b>            | <b><i>Anatolica potanini</i></b>       | <b>OQ_511732</b> | <b>15809</b> |
| <b>Tenebrionidae</b> | <b>Tenebrioninae</b>         | <b><i>Myladina unguiculina</i></b>     | <b>OQ_536315</b> | <b>15542</b> |
