# Supplementary figures and images for: Comparative Mitogenomic Analyses of Darkling Beetles (Coleoptera: Tenebrionidae) Provide Evolutionary Insights into tRNA-like Sequences
Source: MDPI journal article supplement (doi:10.3390/genes14091738), 2023-08-30

A MrBayes\_P123

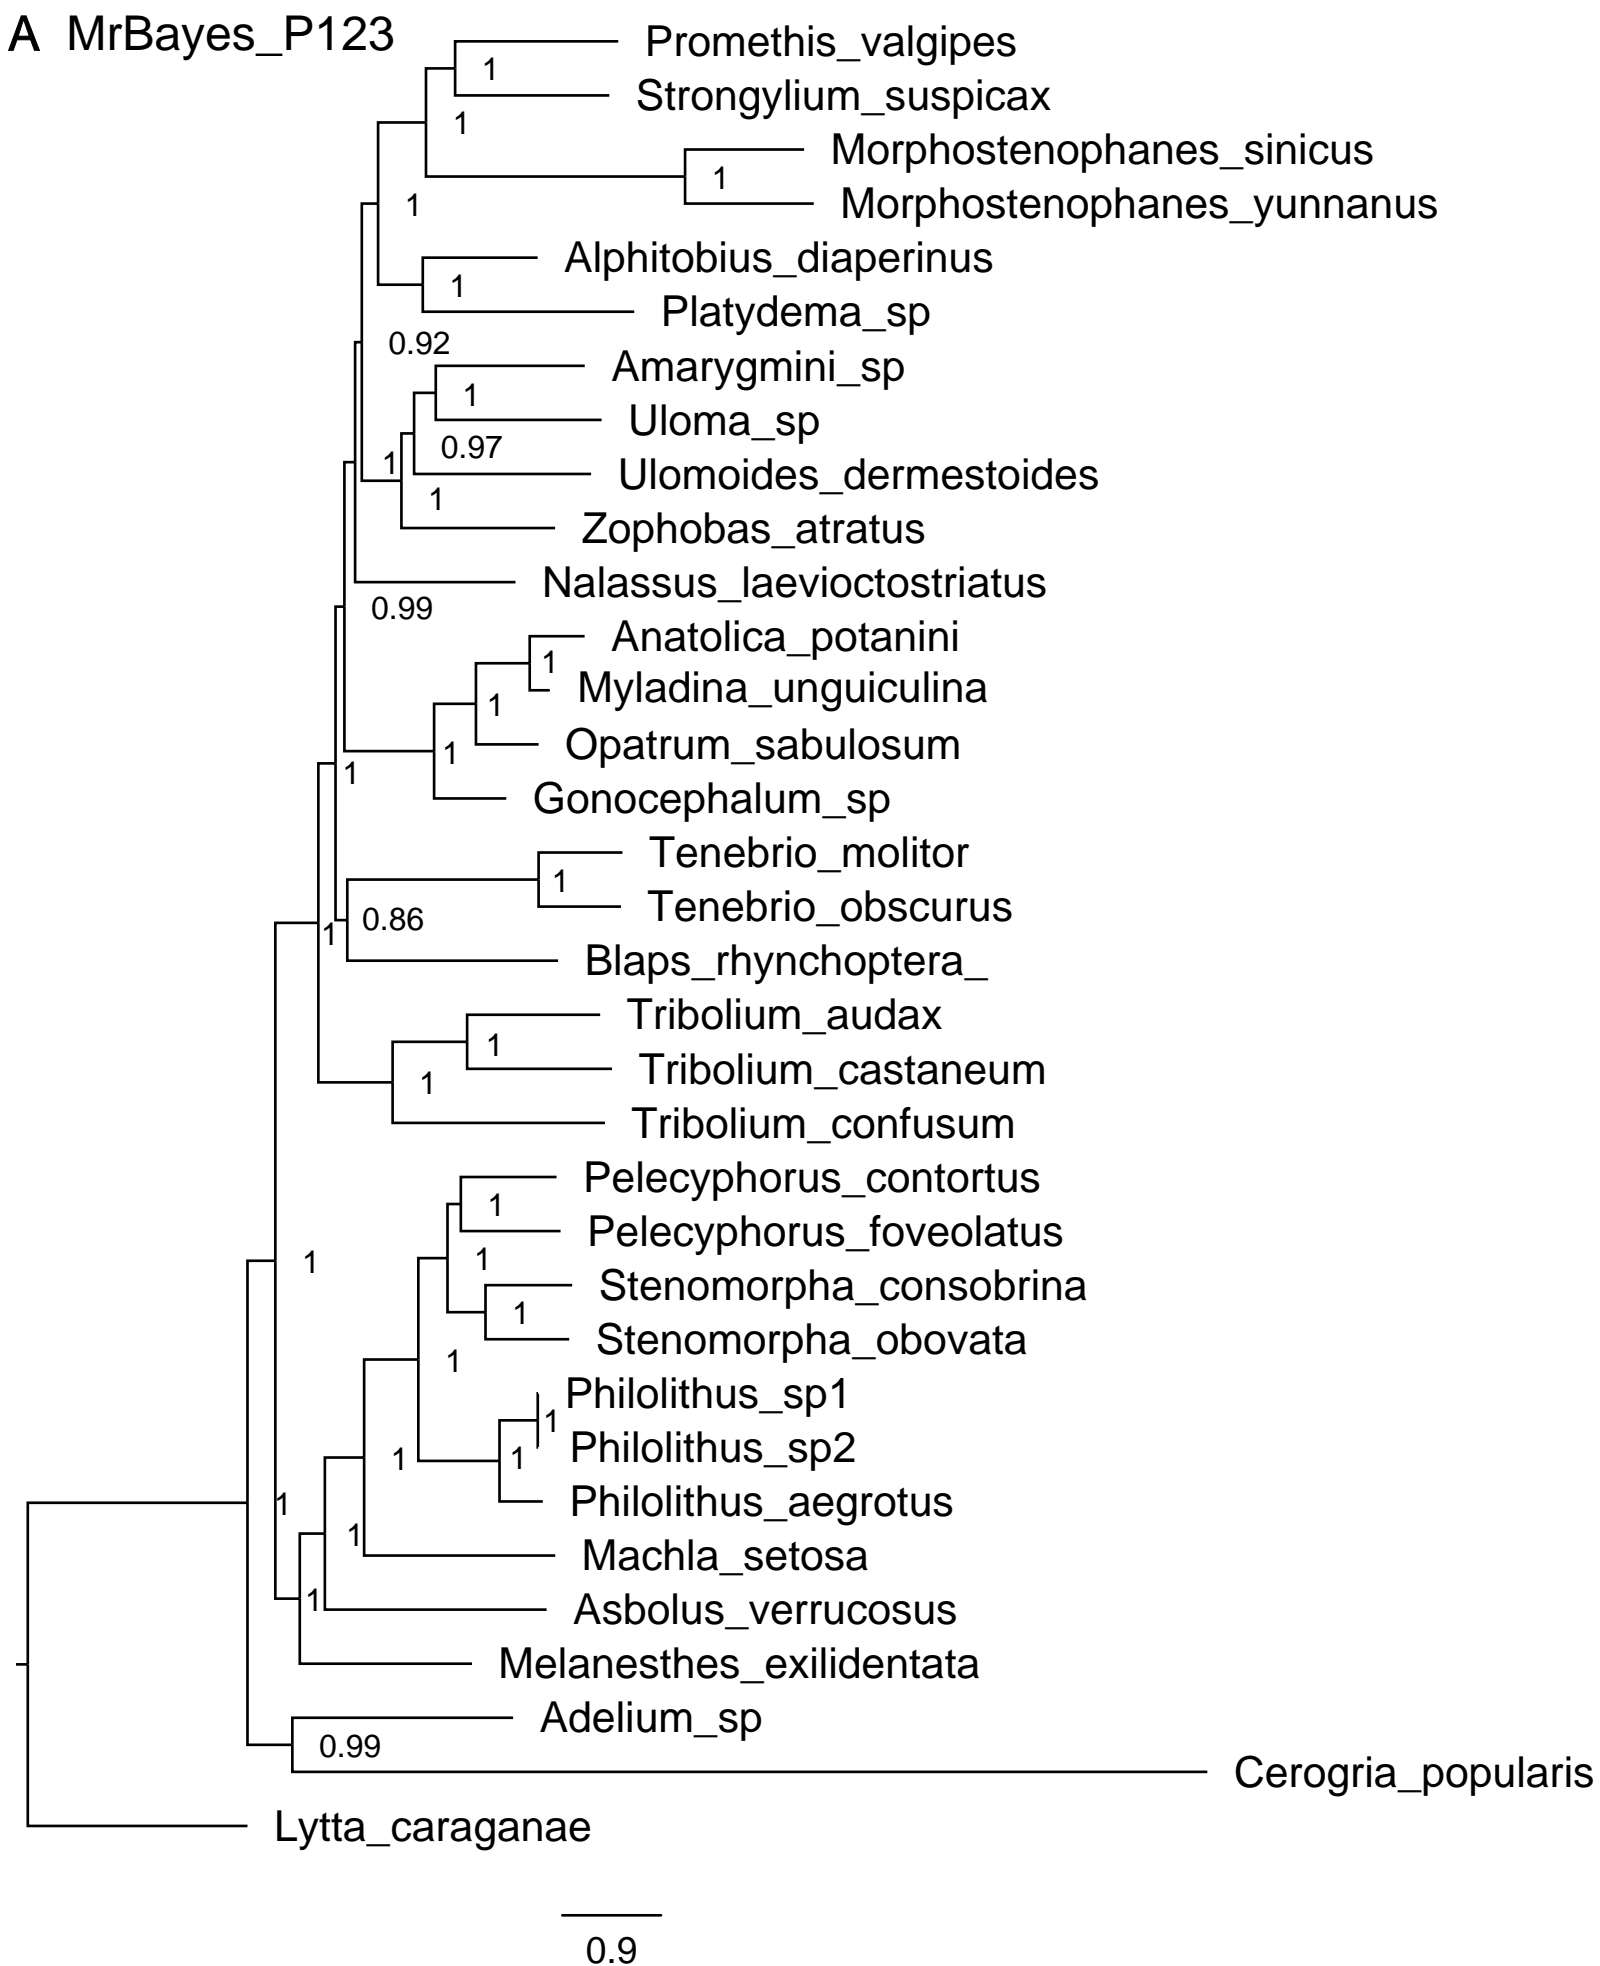

B RAXML\_P123

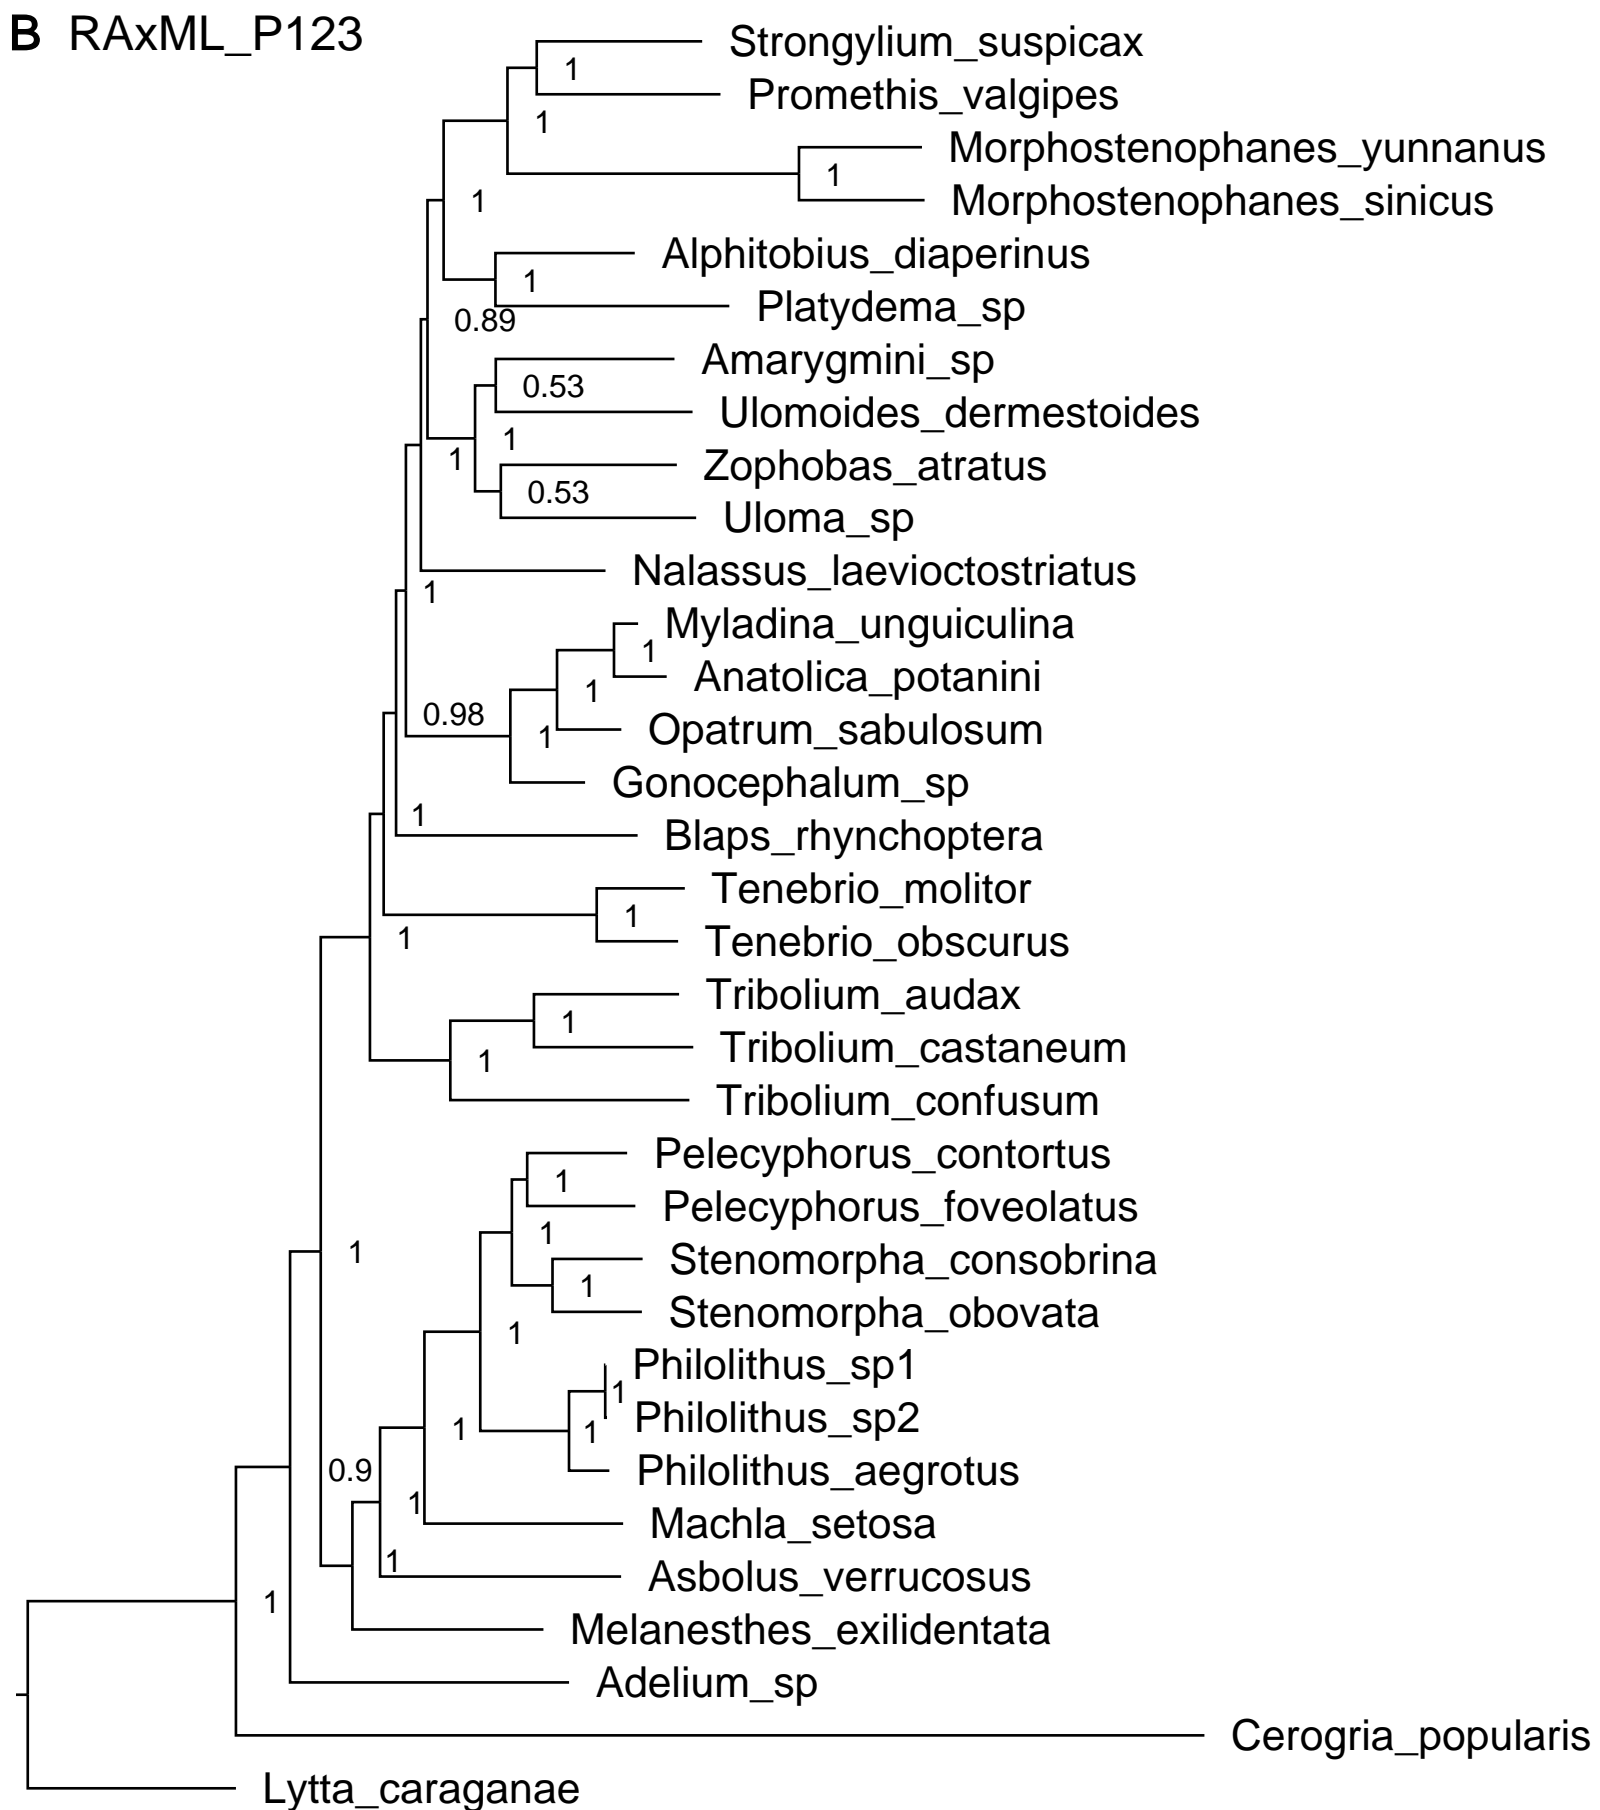

0.7

C MrBayes\_P123AA

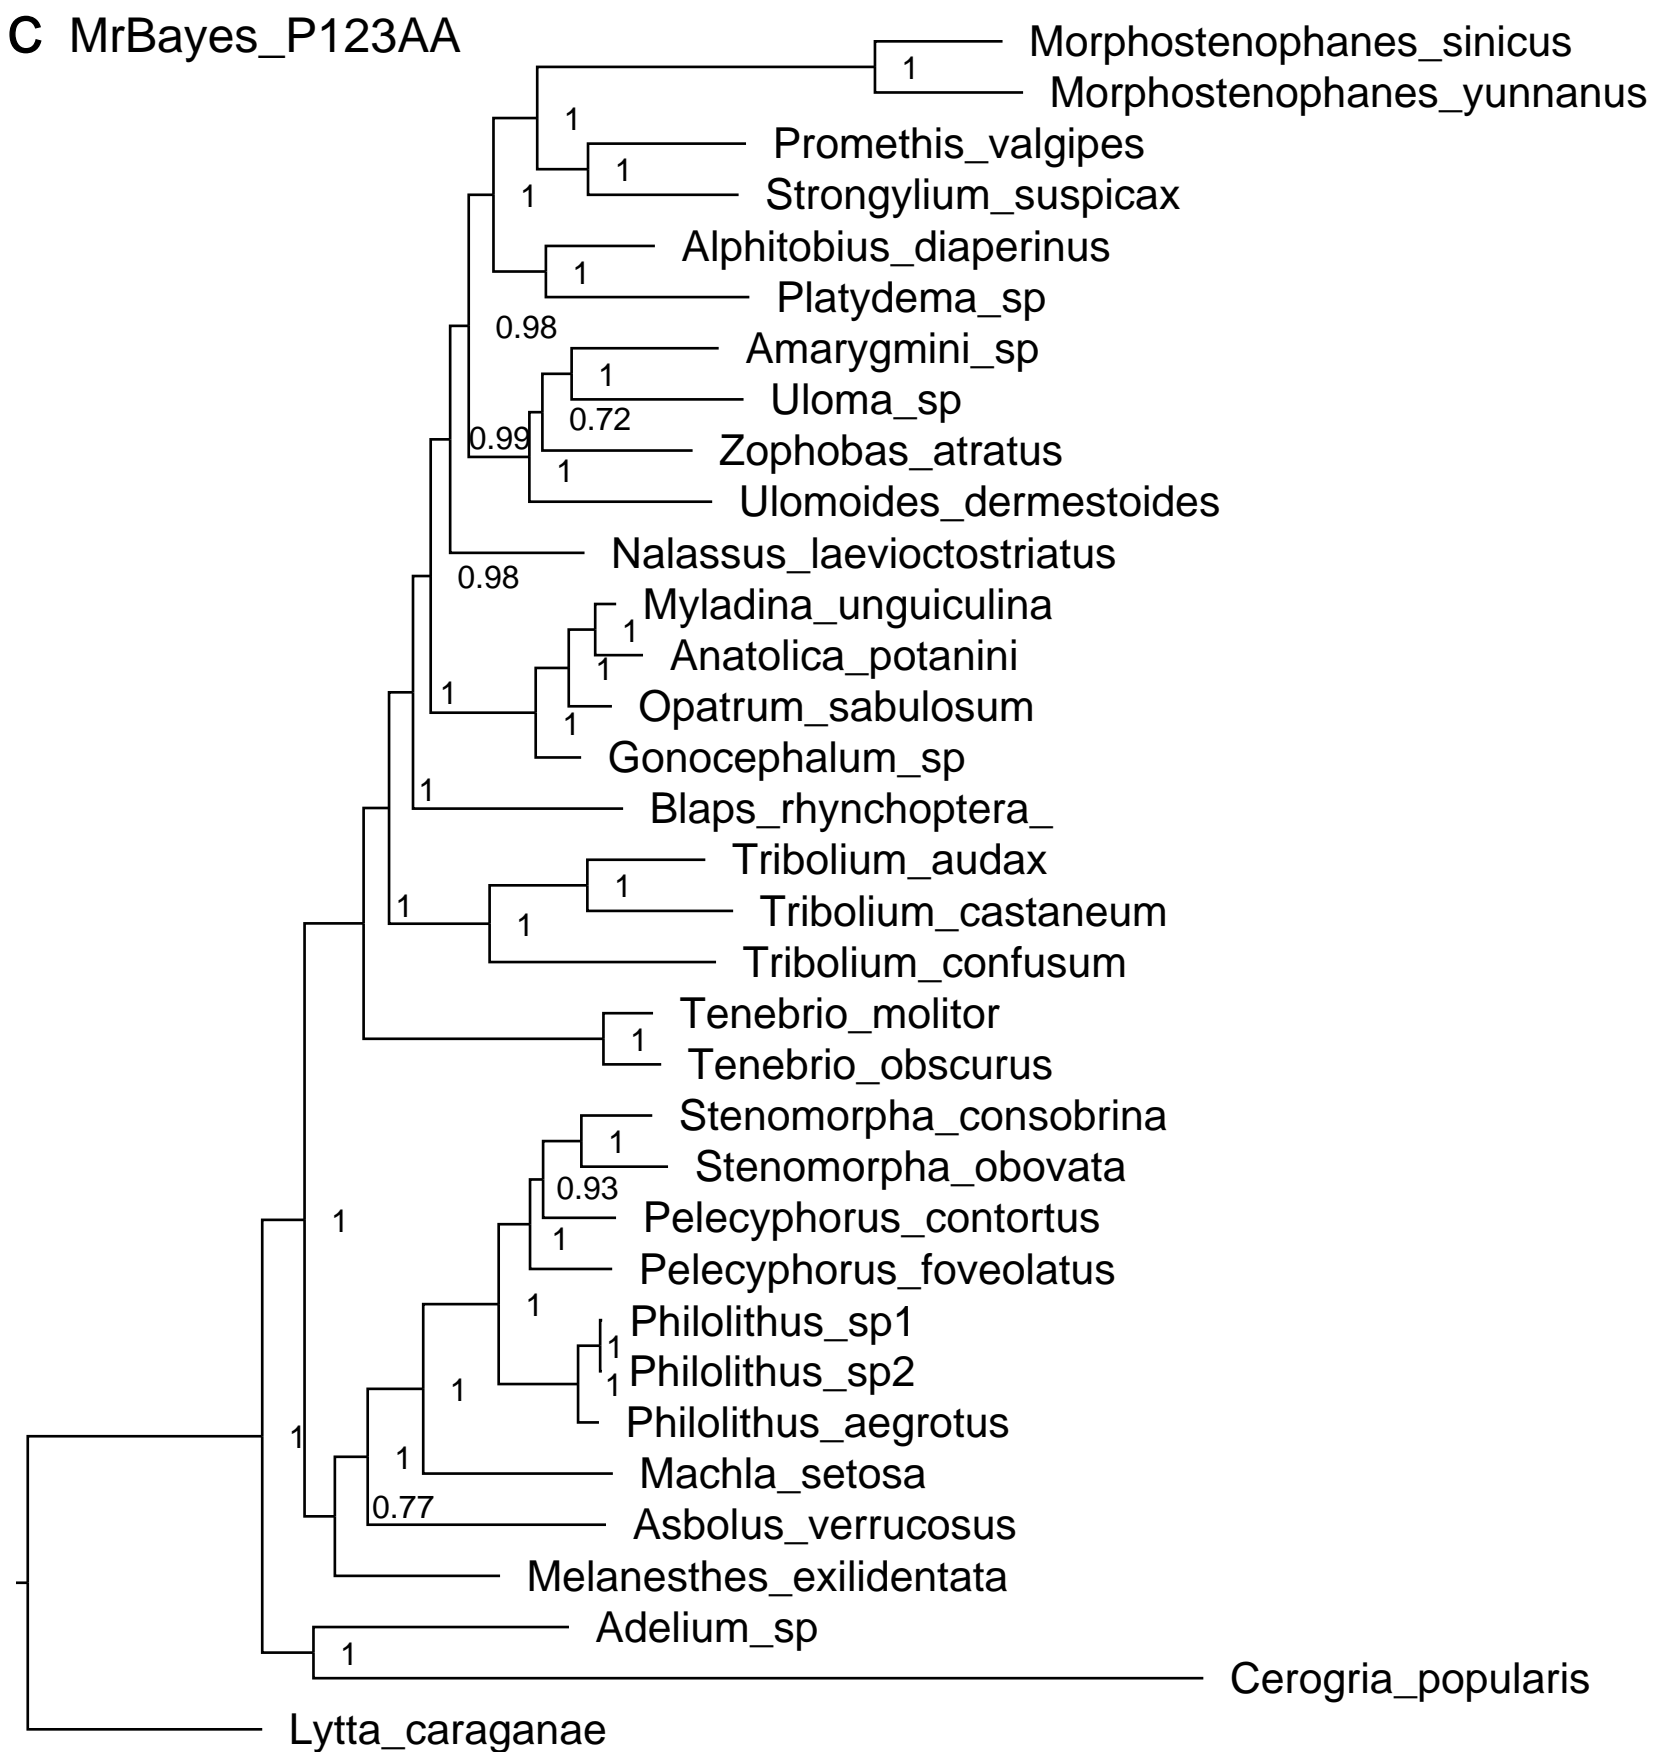

0.2

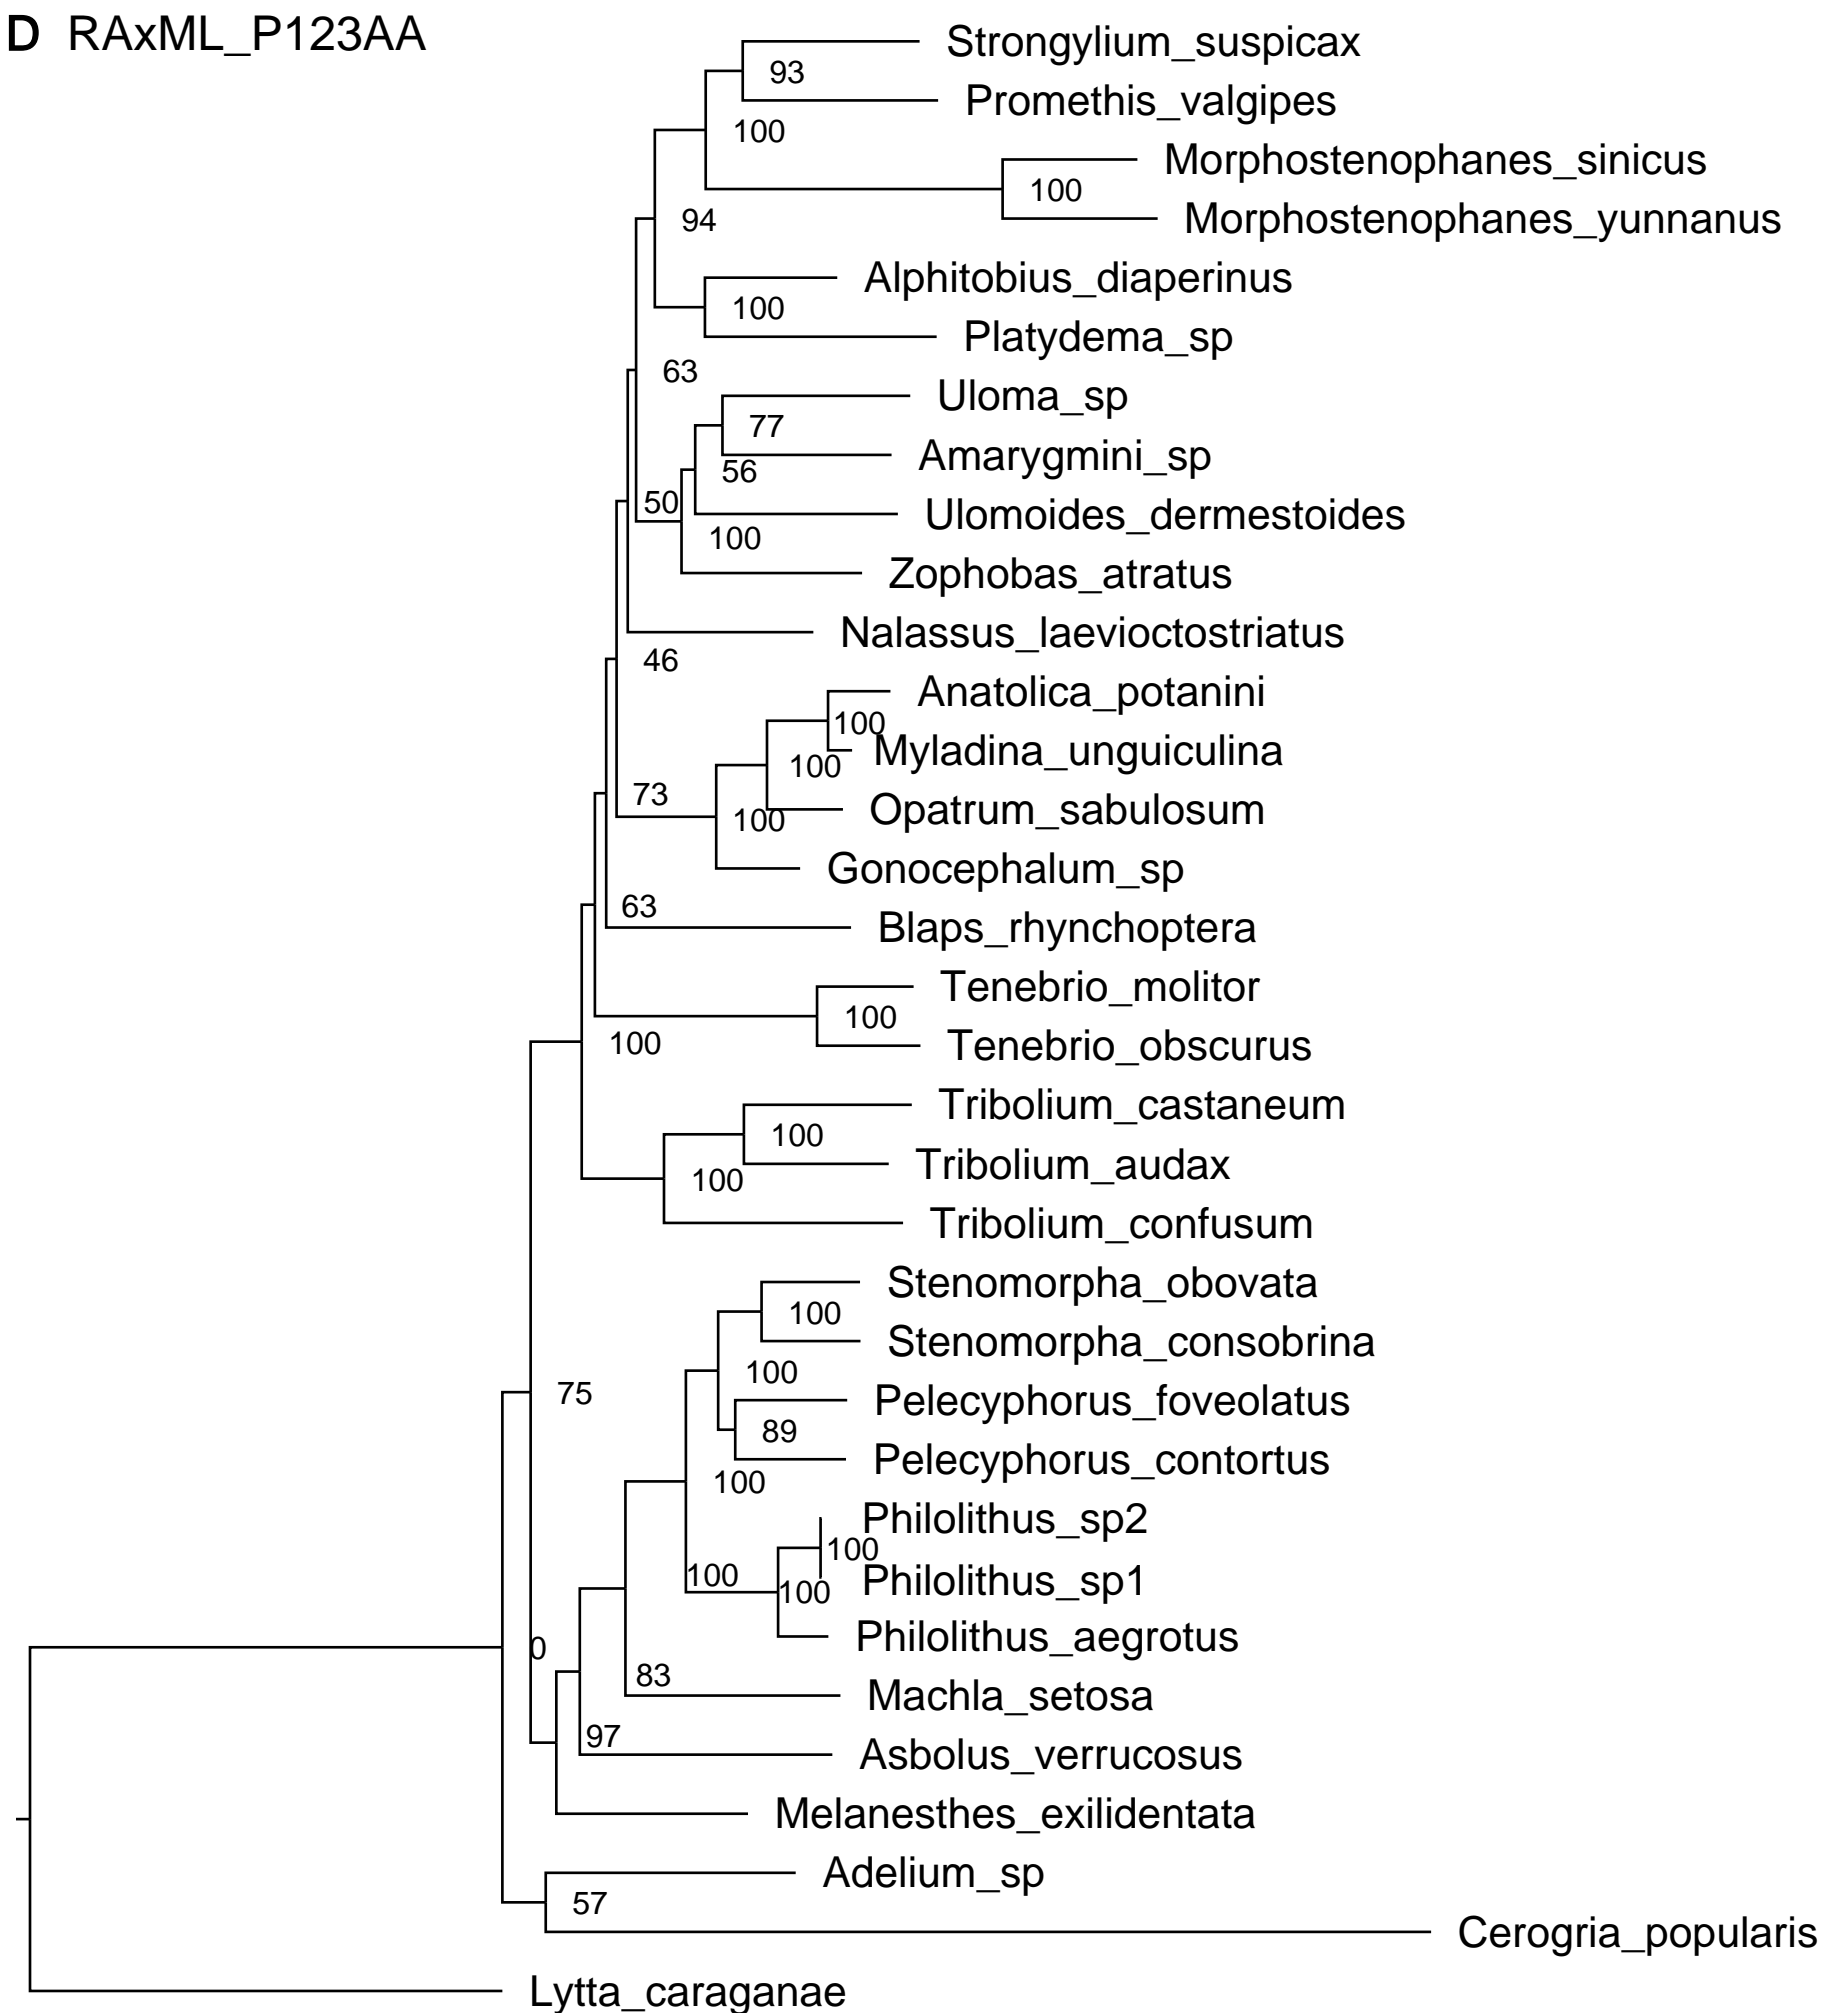

E MrBayes\_P123RNA

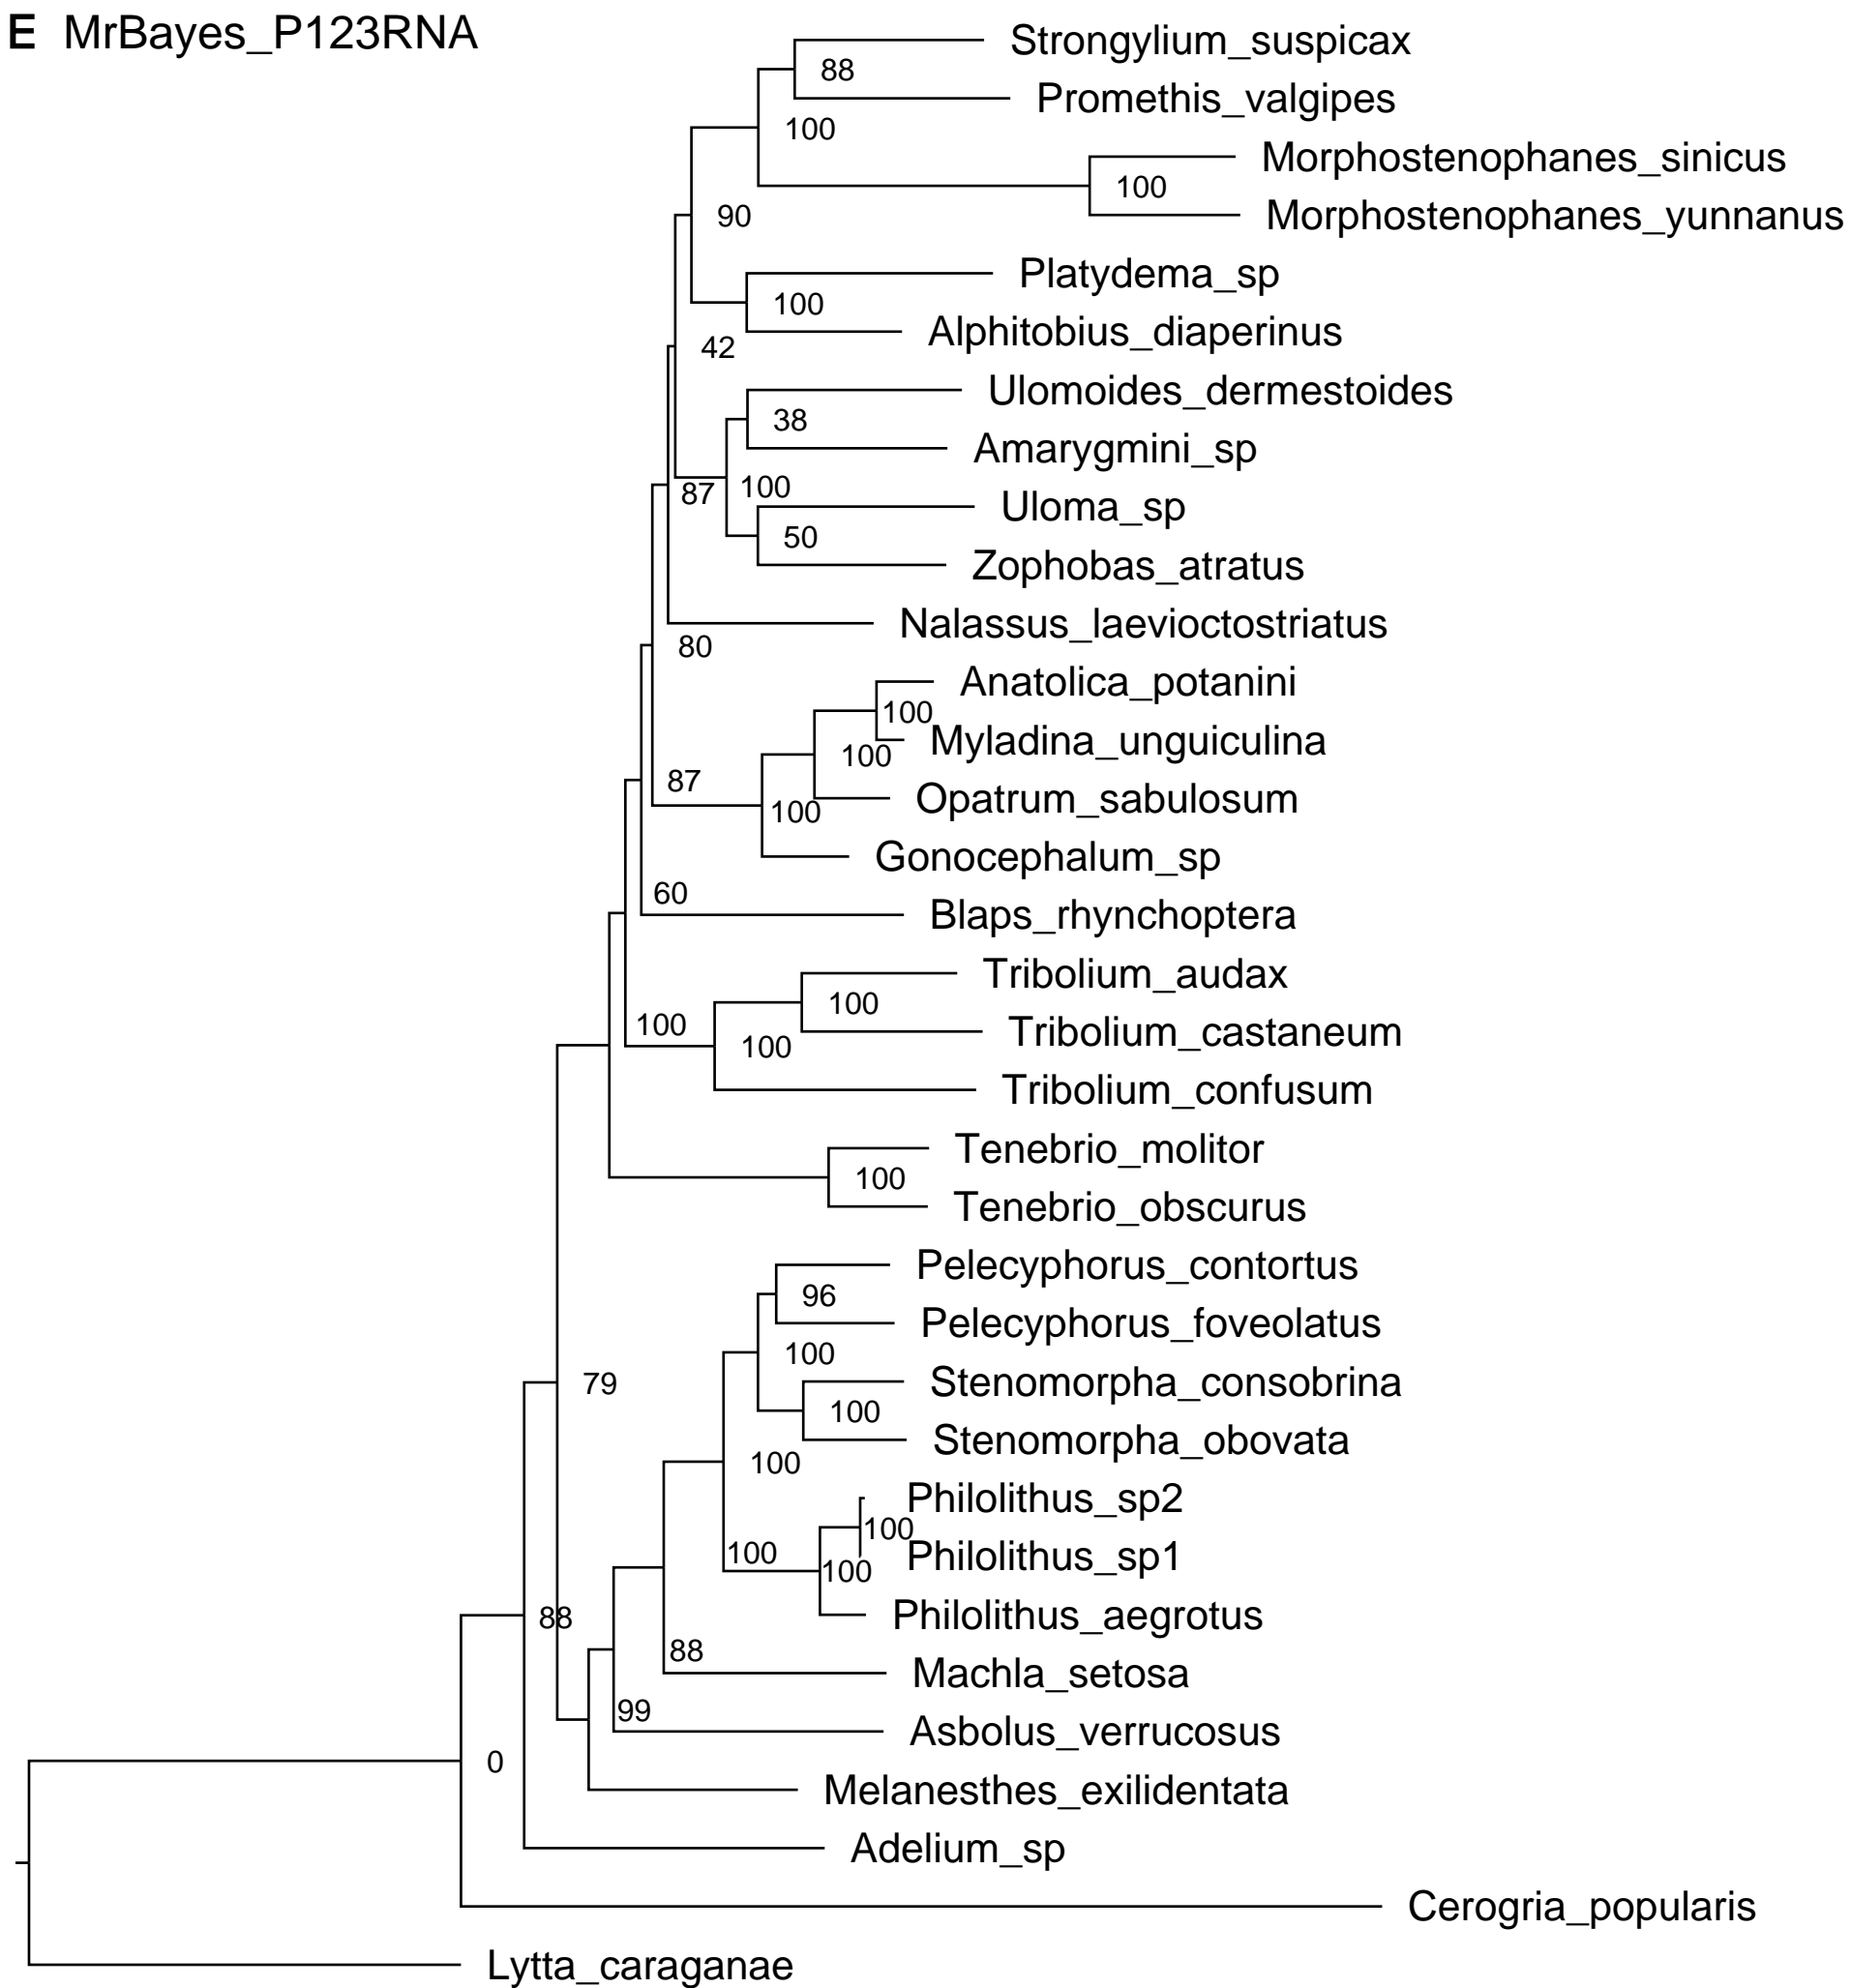

# F RAXML\_P123RNA

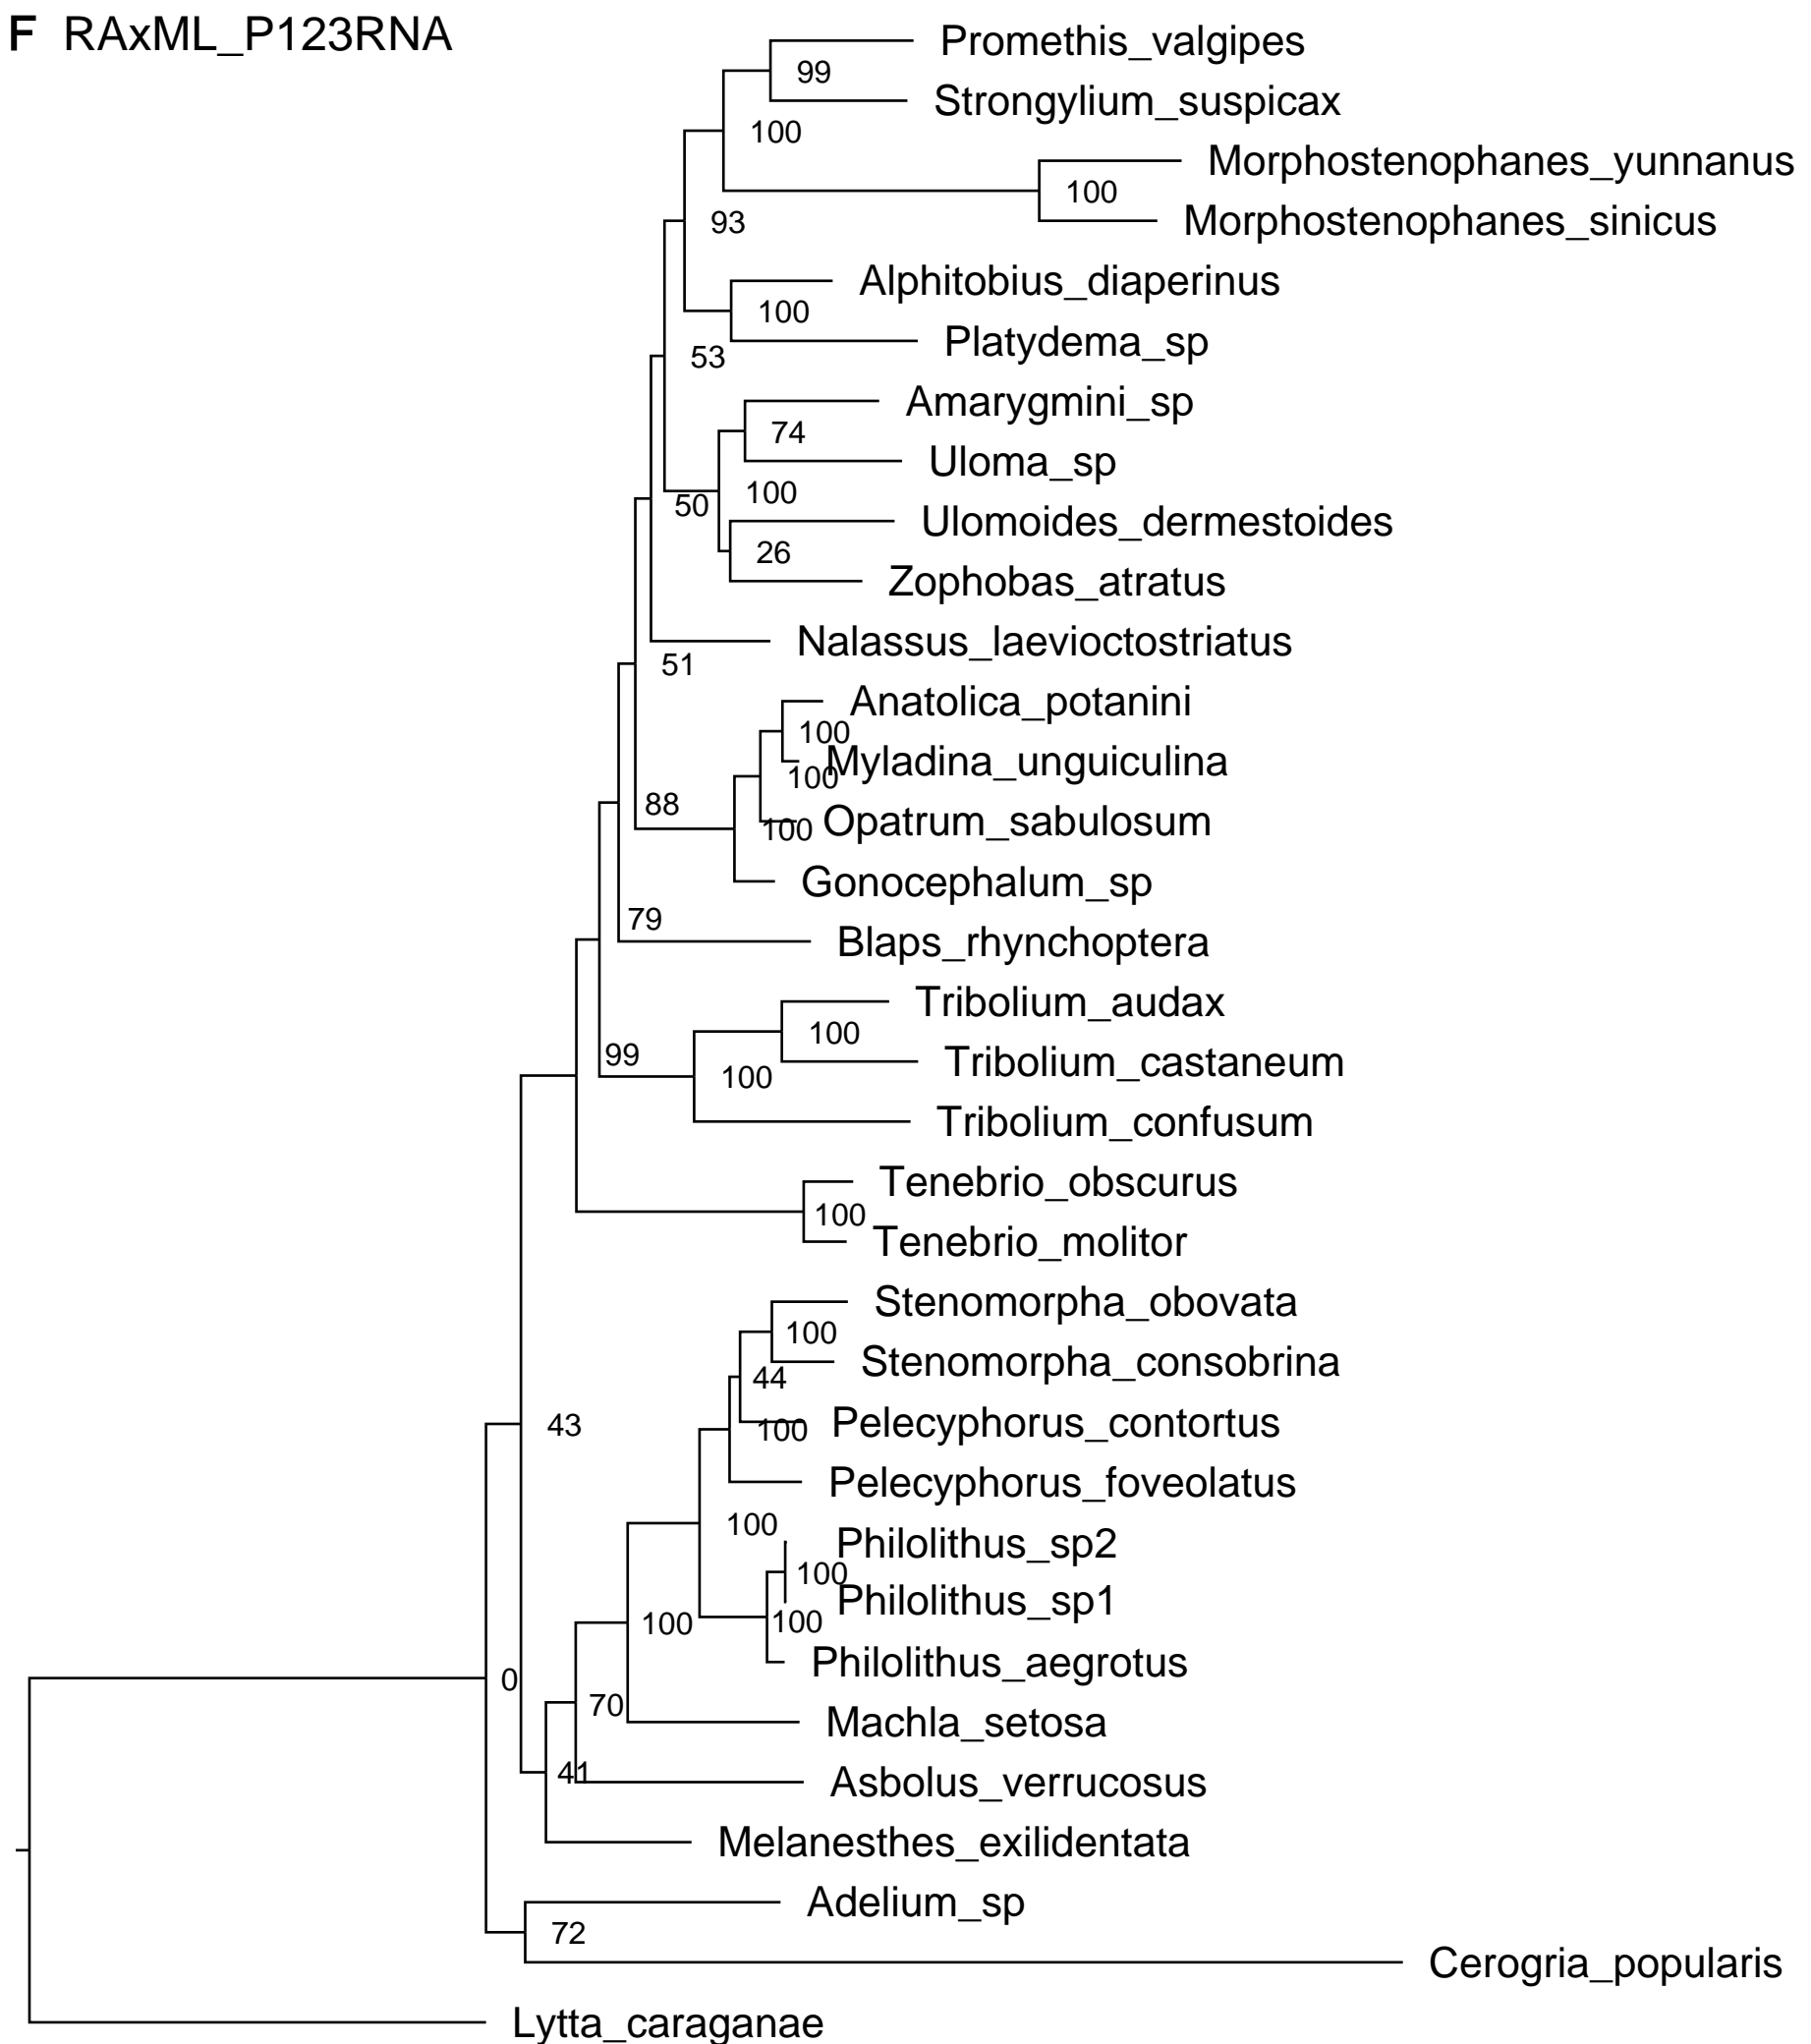

0.2

Supplement: s1 [file s1]

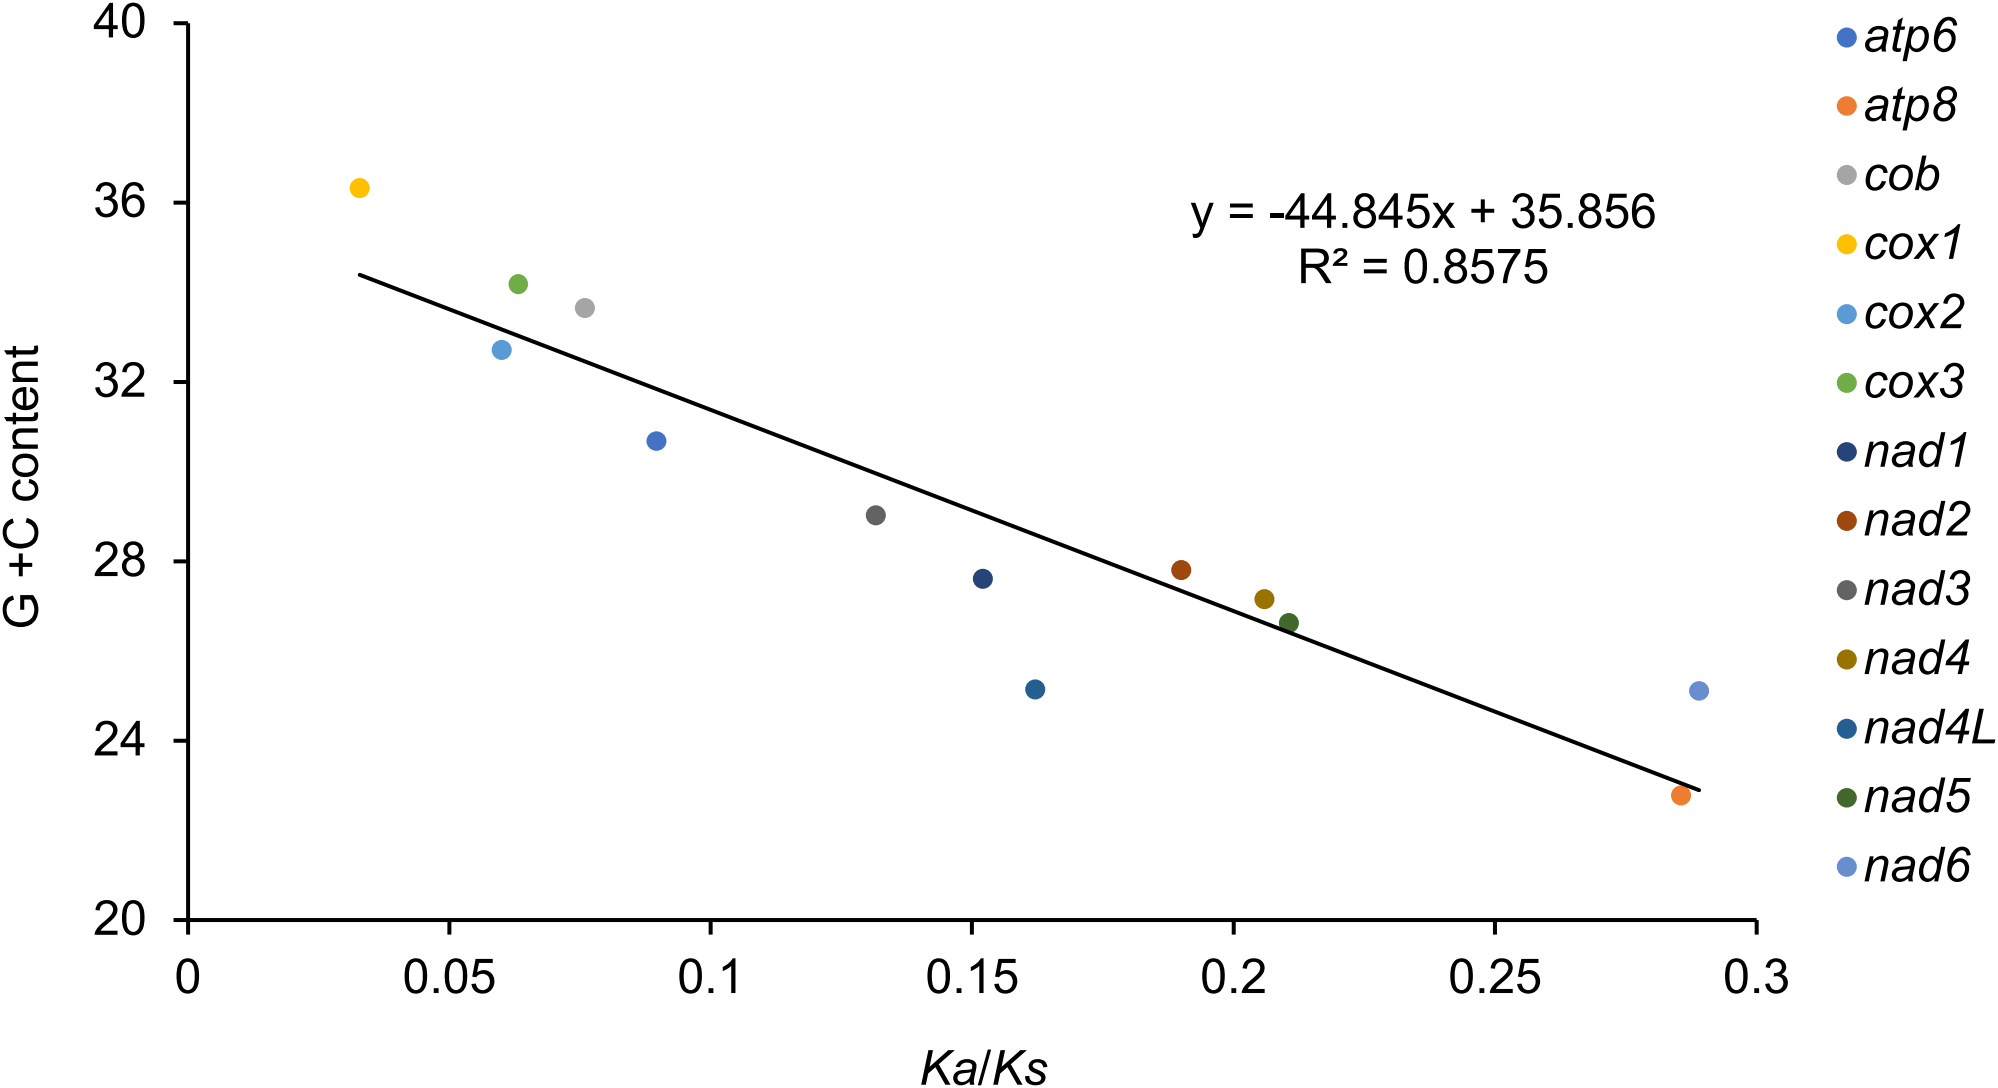

Supplement: s1 [file s1]

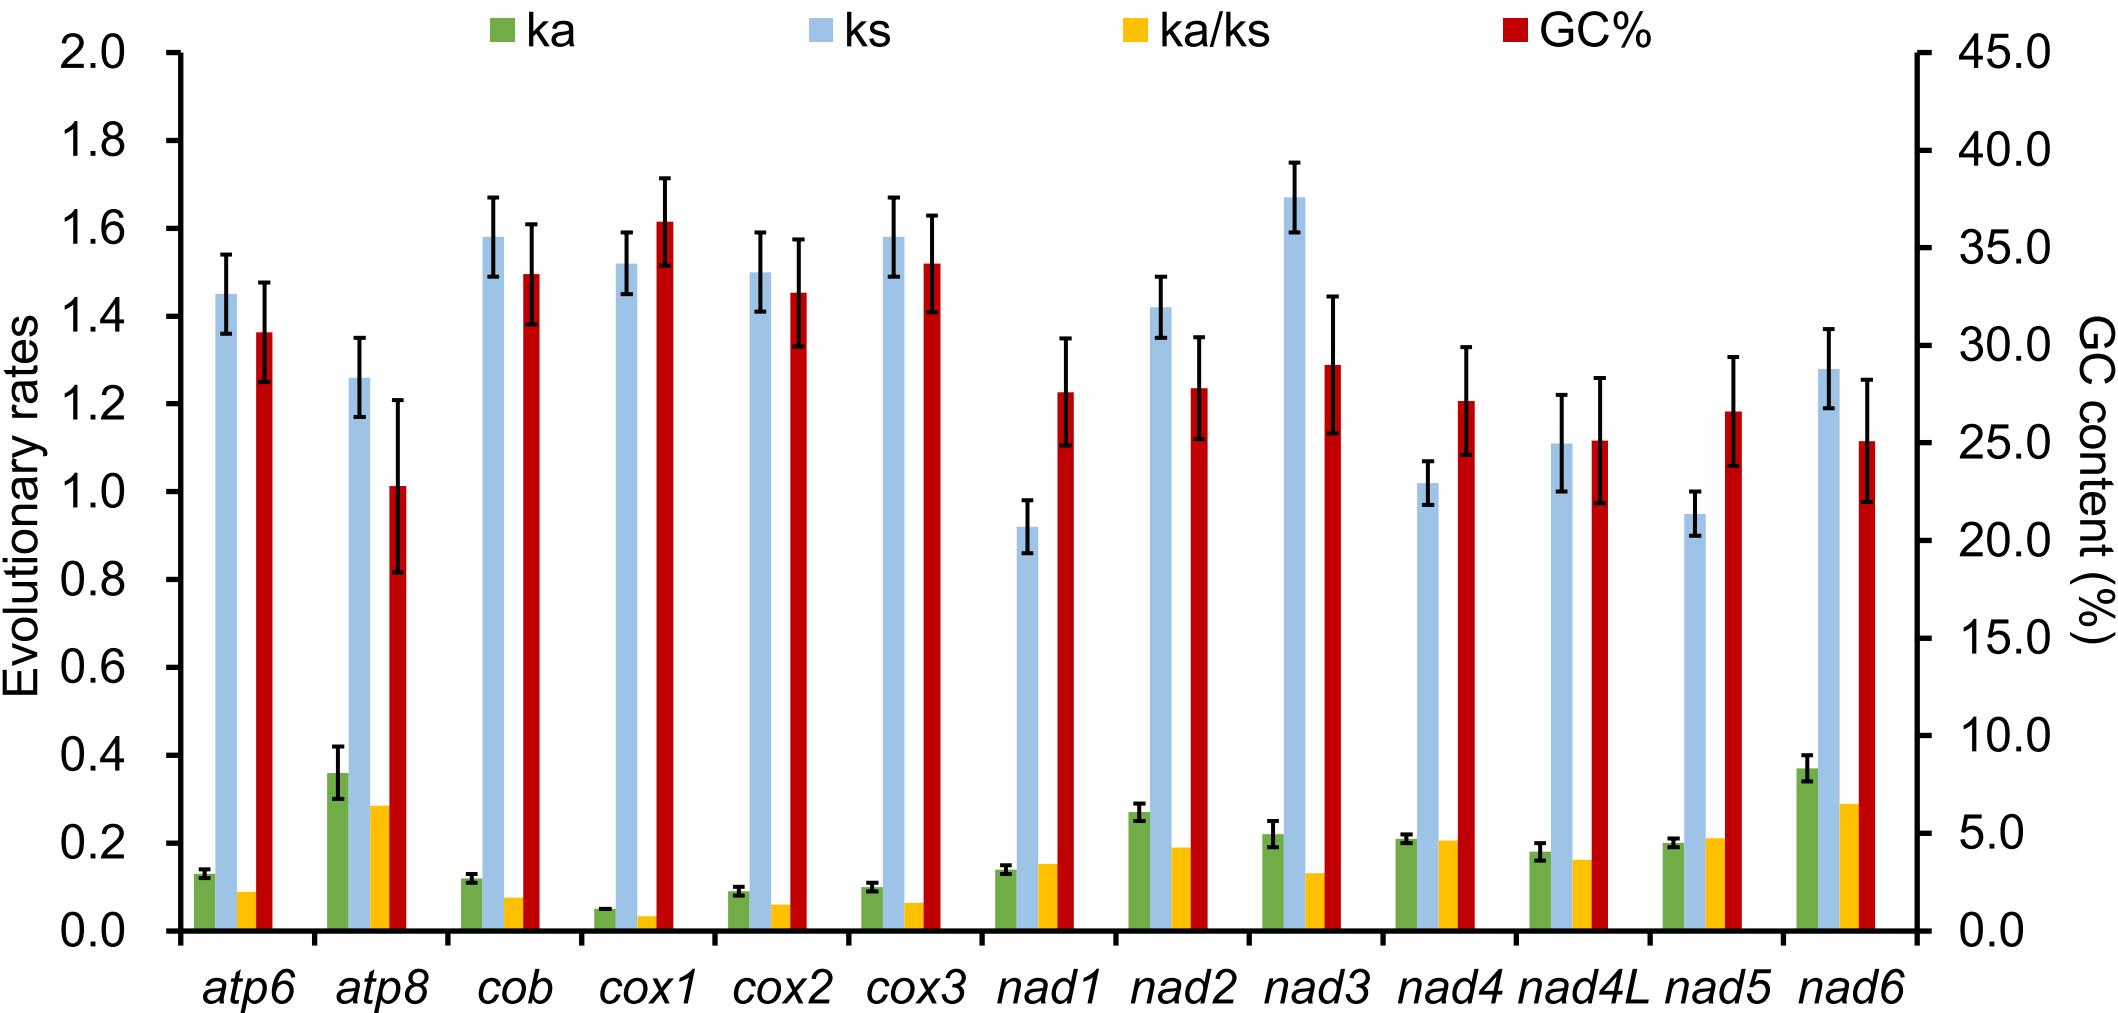

Supplement: s1 [file s1]
